# Supplementary material for: Reversible anion-dependent iodine uptake in nonporous pseudopolymorphic coordination polymers
Source: Royal Society of Chemistry journal article supplement (doi:10.1039/d4ce00402g), 2024-01-01
Supplement: d4ce00402g1.pdf [file d4ce00402g1.pdf]

## Electronic Supplementary Information

### Reversible anion-dependent iodine uptake in nonporous pseudopolymorphic coordination polymers

Ghazale Khorshidi,<sup>a</sup> Behrouz Notash,<sup>\*,a</sup> Maciej Kubicki<sup>b</sup>

<sup>a</sup> Department of Inorganic Chemistry, Shahid Beheshti University, 19839 69411 Tehran,  
Iran.

<sup>b</sup> Faculty of Chemistry, Adam Mickiewicz University, Poznań, Uniwersytetu  
Poznanskiego 8, 61-614 Poznań, Poland.

E-mail: [b\\_notash@sbu.ac.ir](mailto:b_notash@sbu.ac.ir); Tel: +98 2129904363; Fax:+98 2122431663.

#### List of Supporting Information provided in this file

|                                                                                                                                                     |    |
|-----------------------------------------------------------------------------------------------------------------------------------------------------|----|
| Synthesis of ligand <b>4,4-pbubp</b> .....                                                                                                          | 4  |
| <b>Fig. S1</b> <sup>1</sup> H NMR spectrum of <b>4,4-pbubp</b> in DMSO-d <sub>6</sub> , 300 MHz.....                                                | 5  |
| <b>Fig. S2</b> <sup>13</sup> C NMR spectrum of <b>4,4-pbubp</b> in DMSO-d <sub>6</sub> , 75 MHz.....                                                | 6  |
| <b>Fig. S3</b> FT-IR spectrum of ligand <b>4,4-pbubp</b> in KBr pellet.....                                                                         | 7  |
| <b>Fig. S4</b> FT-IR spectrum of <b>CP1</b> in KBr pellet.....                                                                                      | 8  |
| <b>Fig. S5</b> FT-IR spectrum of <b>CP2</b> in KBr pellet .....                                                                                     | 8  |
| <b>Fig. S6</b> FT-IR spectrum of <b>CP3</b> in KBr pellet .....                                                                                     | 9  |
| <b>Fig. S7</b> Plausible conformational isomers for <b>4,4-pbubp</b> .....                                                                          | 10 |
| <b>Fig. S8</b> The dihedral angles between pyridyl rings and urea moieties and between the aromatic rings and the urea moieties of <b>CP1</b> ..... | 11 |
| <b>Fig. S9</b> The dihedral angles between pyridyl rings and urea moieties and between the aromatic rings and the urea moieties of <b>CP2</b> ..... | 11 |

|                                                                                                                                                                                                            |    |
|------------------------------------------------------------------------------------------------------------------------------------------------------------------------------------------------------------|----|
| <b>Fig. S10</b> The dihedral angles between pyridyl rings and urea moieties and between the aromatic rings and the urea moieties of <b>CP3</b> .....                                                       | 11 |
| <b>Fig. S11</b> Hg···Hg distances [Å] and Hg···Hg···Hg angles [°] in zig-zag chains of (a) <b>CP1</b> , (b) <b>CP2</b> and (c) <b>CP3</b> .....                                                            | 12 |
| <b>Fig. S12</b> View of the channels (location of disordered DMSO solvent molecules) in <b>CP1</b> and <b>CP2</b> along b-axis and in <b>CP3</b> along a-axis.....                                         | 13 |
| <b>Fig. S13</b> 2D fingerprint plots for <b>CP1</b> , <b>CP2</b> and <b>CP3</b> .....                                                                                                                      | 14 |
| <b>Fig. S14</b> Distribution of the intermolecular contacts base on Hirshfeld surface analysis for <b>CP1</b> , <b>CP2</b> and <b>CP3</b> .....                                                            | 15 |
| <b>Fig. S15</b> PXRD patterns of <b>CP1</b> . Red: Simulated from the X-ray single crystal data; Blue: observed for the as-synthesized solids.....                                                         | 16 |
| <b>Fig. S16</b> PXRD patterns of <b>CP2</b> . Red: Simulated from the X-ray single crystal data; Blue: observed for the as-synthesized solids.....                                                         | 16 |
| <b>Fig. S17</b> PXRD patterns of <b>CP3</b> . Red: Simulated from the X-ray single crystal data; Blue: observed for the as-synthesized solids.....                                                         | 17 |
| <b>Fig. S18</b> TGA curves of <b>CP1</b> , <b>CP2</b> and <b>CP3</b> .....                                                                                                                                 | 18 |
| <b>Fig. S19</b> PXRD patterns of <b>CP1</b> : simulated, as-synthesized, and after immersion in H <sub>2</sub> O and different organic solvents for 1 h, at 25 and 50 °C .....                             | 19 |
| <b>Fig. S20</b> PXRD patterns of <b>CP2</b> : simulated, as-synthesized, and after immersion in H <sub>2</sub> O and different organic solvents for 1 h, at 25 and 50 °C .....                             | 20 |
| <b>Fig. S21</b> PXRD patterns of <b>CP3</b> : simulated, as-synthesized, and after immersion in H <sub>2</sub> O and different organic solvents for 1 h, at 25 and 50 °C .....                             | 21 |
| <b>Fig S22</b> ATR-FTIR spectra of <b>CP1</b> : as-synthesized, and after immersion in H <sub>2</sub> O and different organic solvents for 1 h, at 25 and 50 °C.....                                       | 22 |
| <b>Fig S23</b> ATR-FTIR spectra of <b>CP2</b> : as-synthesized, and after immersion in H <sub>2</sub> O and different organic solvents for 1 h, at 25 and 50 °C .....                                      | 23 |
| <b>Fig S24</b> ATR-FTIR spectra of <b>CP3</b> : as-synthesized, and after immersion in H <sub>2</sub> O and different organic solvents for 1 h, at 25 and 50 °C .....                                      | 24 |
| <b>Fig. S25</b> Calibration plot of standard iodine in cyclohexane by UV-Vis spectra.....                                                                                                                  | 25 |
| <b>Fig. S26</b> The pseudo-first-order, pseudo-second-order, intraparticle diffusion, and Elovich models for the uptake of I <sub>2</sub> by compound <b>CP1</b> at 0.005 M concentration of solution..... | 26 |

|                                                                                                                                                                                                                                               |    |
|-----------------------------------------------------------------------------------------------------------------------------------------------------------------------------------------------------------------------------------------------|----|
| <b>Fig. S27</b> The pseudo-first-order, pseudo-second-order, intraparticle diffusion, and Elovich models for the uptake of I <sub>2</sub> by compound <b>CP2</b> at 0.005 M concentration of solution.....                                    | 27 |
| <b>Fig. S28</b> The pseudo-first-order, pseudo-second-order, intraparticle diffusion, and Elovich models for the uptake of I <sub>2</sub> by compound <b>CP3</b> at 0.005 M concentration of solution.....                                    | 28 |
| <b>Fig. S29</b> The Langmuir, Temkin, and Freundlich isotherm models for compound <b>CP1</b> .....                                                                                                                                            | 29 |
| <b>Fig. S30</b> The Langmuir, Temkin, and Freundlich isotherm models for compound <b>CP2</b> .....                                                                                                                                            | 29 |
| <b>Fig. S31</b> The Langmuir, Temkin, and Freundlich isotherm models for compound <b>CP3</b> .....                                                                                                                                            | 29 |
| <b>Fig. S32</b> The UV-Vis spectra of compounds <b>CP1@I<sub>2</sub></b> , <b>CP2@I<sub>2</sub></b> and <b>CP3@I<sub>2</sub></b> immersed in 5 mL ethanol and the photograph of the releasing process at the beginning and after 120 min..... | 30 |
| <b>Fig. S33</b> Comparison between the simulation powder X-ray diffraction patterns of the <b>CP1</b> , before iodine uptake, the <b>CP1@I<sub>2</sub></b> and recovered <b>CP1</b> .....                                                     | 31 |
| <b>Fig. S34</b> Comparison between the simulation powder X-ray diffraction patterns of the <b>CP2</b> , before iodine uptake, the <b>CP2@I<sub>2</sub></b> and recovered <b>CP2</b> .....                                                     | 32 |
| <b>Fig. S35</b> Comparison between the simulation powder X-ray diffraction patterns of the <b>CP3</b> , before iodine uptake, the <b>CP3@I<sub>2</sub></b> and recovered <b>CP3</b> .....                                                     | 33 |
| <b>Fig. S36</b> ATR-FTIR spectra of <b>4,4-pbubp</b> , compounds <b>CP1</b> , <b>CP2</b> and <b>CP3</b> before and after iodine uptake .....                                                                                                  | 34 |
| <b>Table S1</b> Selected bond lengths [Å] and angles [°] for <b>CP1</b> .....                                                                                                                                                                 | 35 |
| <b>Table S2</b> Selected bond lengths [Å] and angles [°] for <b>CP2</b> .....                                                                                                                                                                 | 35 |
| <b>Table S3</b> Selected bond lengths [Å] and angles [°] for <b>CP3</b> .....                                                                                                                                                                 | 35 |
| <b>Table S4</b> Geometry of intermolecular hydrogen bonds (D–H···A) for <b>CP1-CP3</b> .....                                                                                                                                                  | 36 |
| <b>Table S5</b> Kinetics parameters for iodine uptake from the solution by <b>CP1</b> , <b>CP2</b> and <b>CP3</b> at room temperature.....                                                                                                    | 37 |
| <b>Table S6</b> Langmuir, Freundlich, and Temkin parameters of iodine removal by <b>CP1</b> , <b>CP2</b> and <b>CP3</b> at room temperature.....                                                                                              | 37 |
| X-ray crystallography.....                                                                                                                                                                                                                    | 38 |
| Analysis of Hirshfeld surfaces.....                                                                                                                                                                                                           | 39 |
| References.....                                                                                                                                                                                                                               | 40 |

**Synthesis of ligand 4,4-pbubp<sup>1</sup>**: Isonicotinic acid hydrazide (6 mmol, 822 mg) was dissolved in 20 ml 25% aq. HCl at 0 °C and NaNO<sub>2</sub> (10.0 mmol, 689 mg) dissolved in 5 mL ice cold water was added to it with stirring. Stirring was continued for 1 h, maintaining the temperature below 5 °C. The solution was neutralized by adding solid Na<sub>2</sub>CO<sub>3</sub> and extracted with 50 mL toluene. The organic extracts were dried over anhydrous Na<sub>2</sub>SO<sub>4</sub> and filtered. Benzene-1,4-diamine (3.0 mmol, 324 mg) was added to the filtrate and refluxed for 6 h. The precipitate was filtered and dried to afford white solid powder **4,4-pbubp** in 70% yield. <sup>1</sup>H NMR (DMSO-d<sub>6</sub>, 300 MHz): δ= 9.12(s, 1H), 8.83(s, 1H), 8.36-8.37(d, 2H), 7.44-7.45(d, 2H) & 7.41(s, 4H). <sup>13</sup>C NMR (DMSO-d<sub>6</sub>, 75 MHz) δ= 114.87, 121.97, 136.54, 149.22, 152.71 & 154.80. m.p >260 °C. IR data (KBr pellet, cm<sup>-1</sup>) (Fig. S3): 3349(w), 3028(w), 1921(w), 1812(w), 1706(s), 1671(s), 1602(s), 1558(m), 1412(m), 1331(m), 1291(m), 1248(m), 1205(m), 1044(m), 990(m), 906(w), 854(m), 820(m), 796(m), 769(m), 748(w), 734(m), 651(s), 575(s), 535(s), 506(m), 419(w).

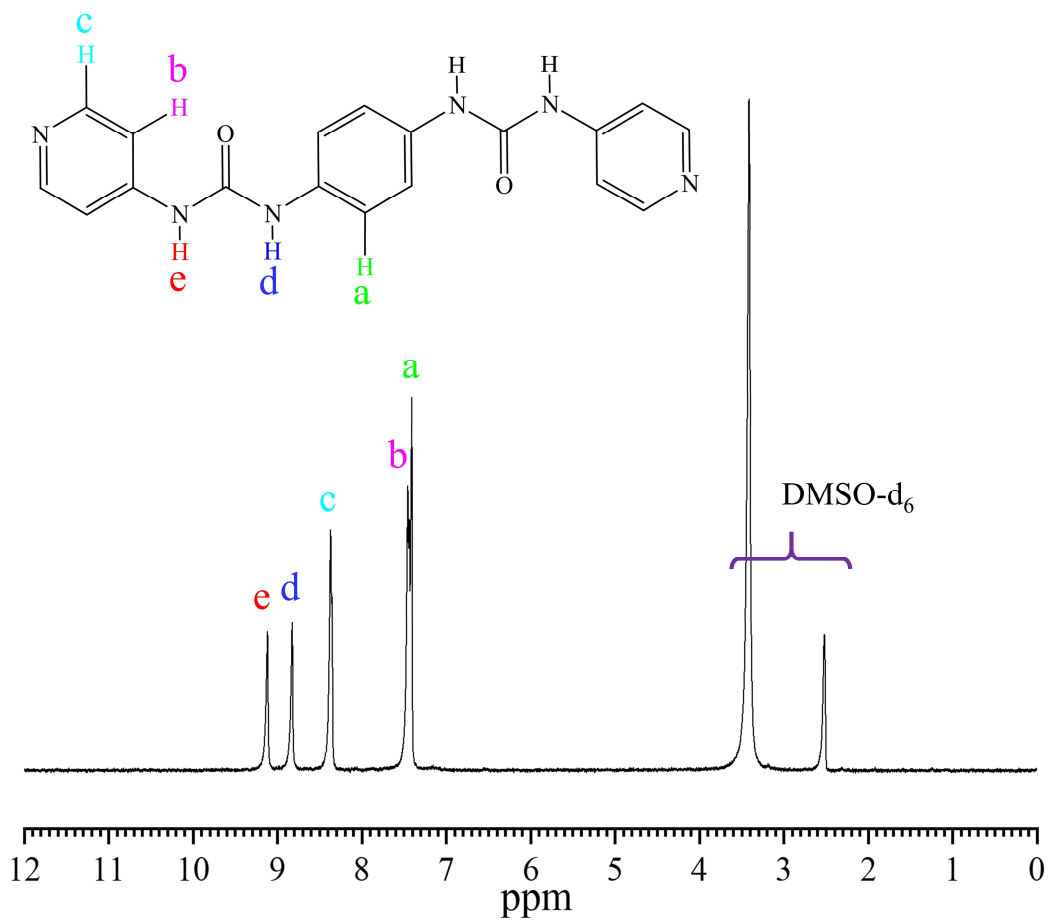

**Fig. S1** <sup>1</sup>H NMR spectrum of **4,4-pbubp** in DMSO-d<sub>6</sub>, 300 MHz.

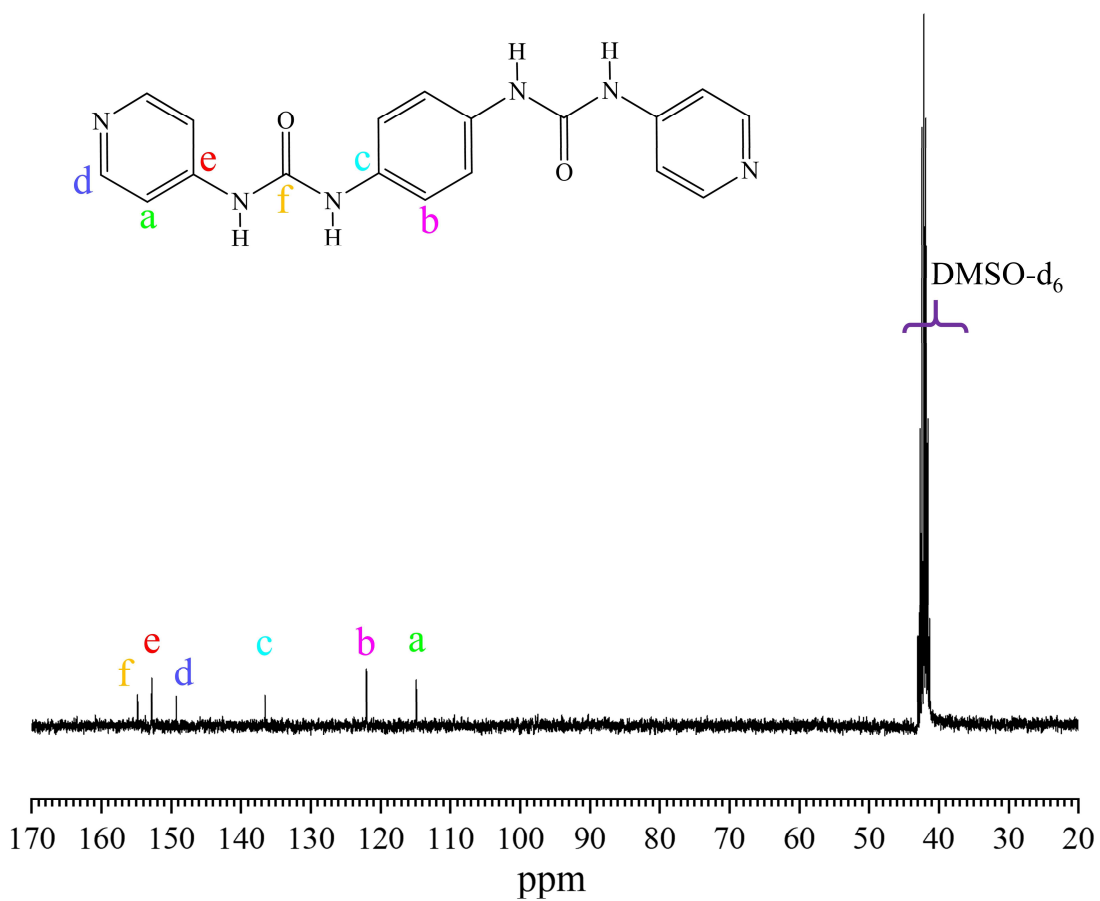

**Fig. S2**  $^{13}\text{C}$  NMR spectrum of **4,4-pbubp** in  $\text{DMSO-d}_6$ , 75 MHz.

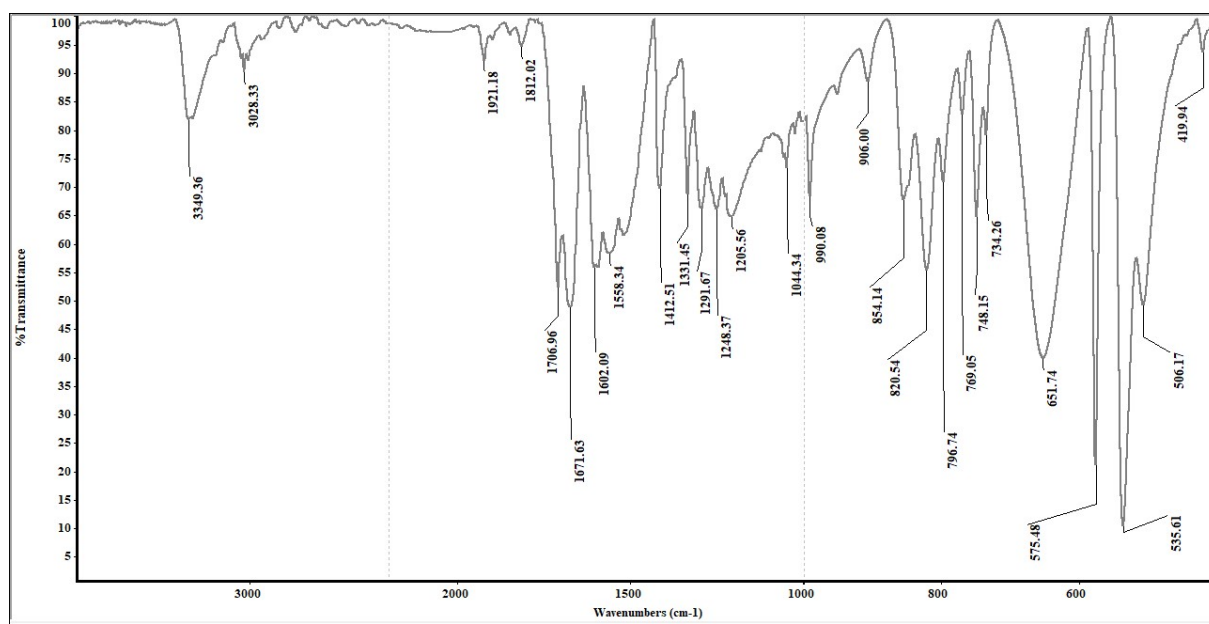

**Fig. S3** FT-IR spectrum of ligand **4,4-pbubp** in KBr pellet.

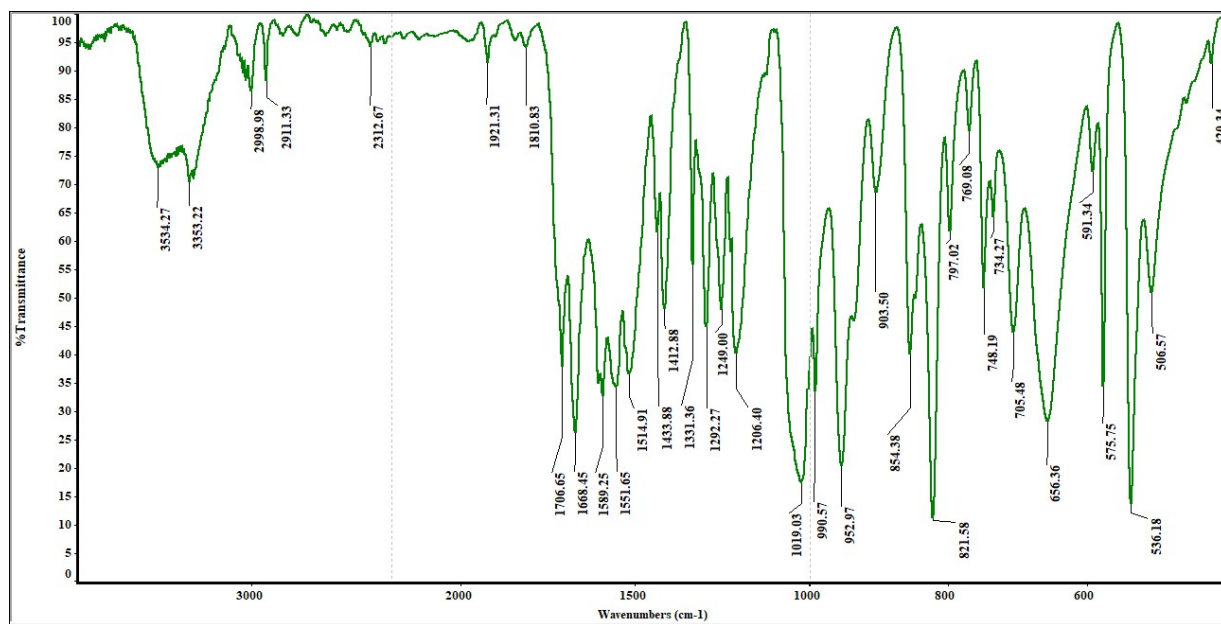

**Fig. S4** FT-IR spectrum of CP1 in KBr pellet.

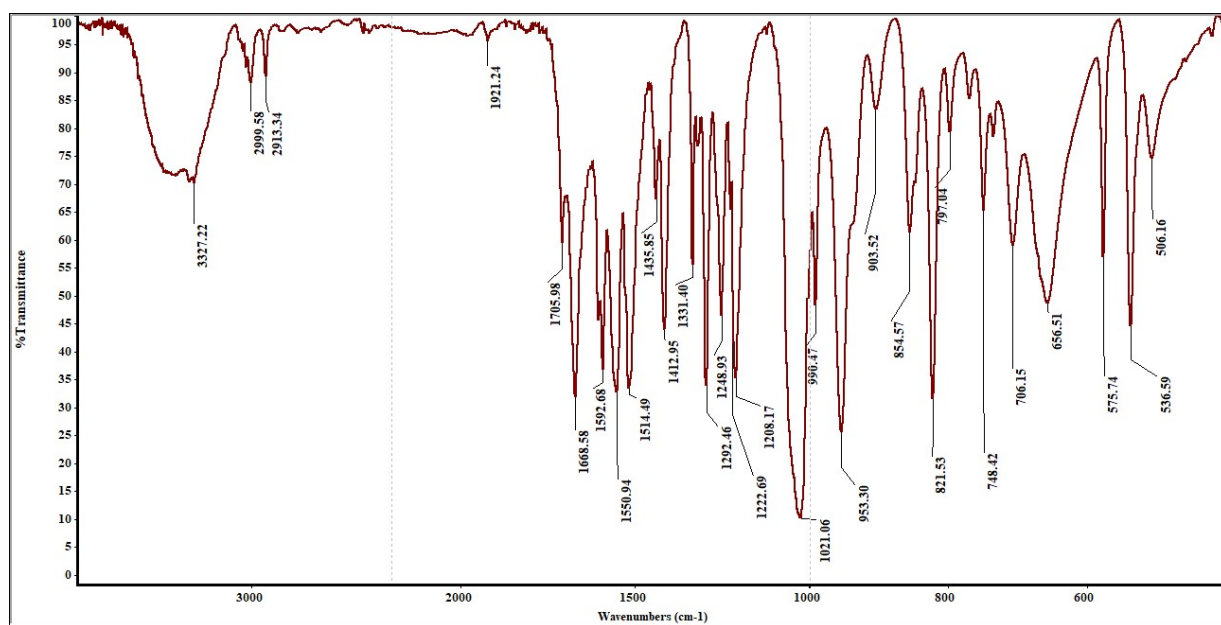

**Fig. S5** FT-IR spectrum of CP2 in KBr pellet.



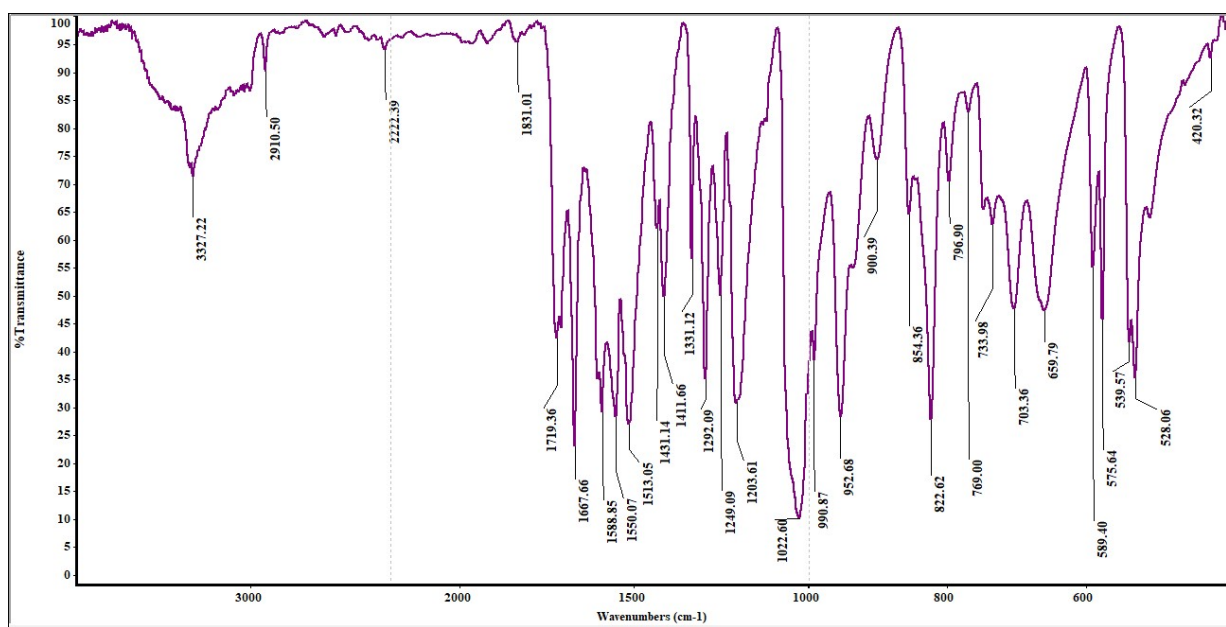

**Fig. S6** FT-IR spectrum of CP3 in KBr pellet.

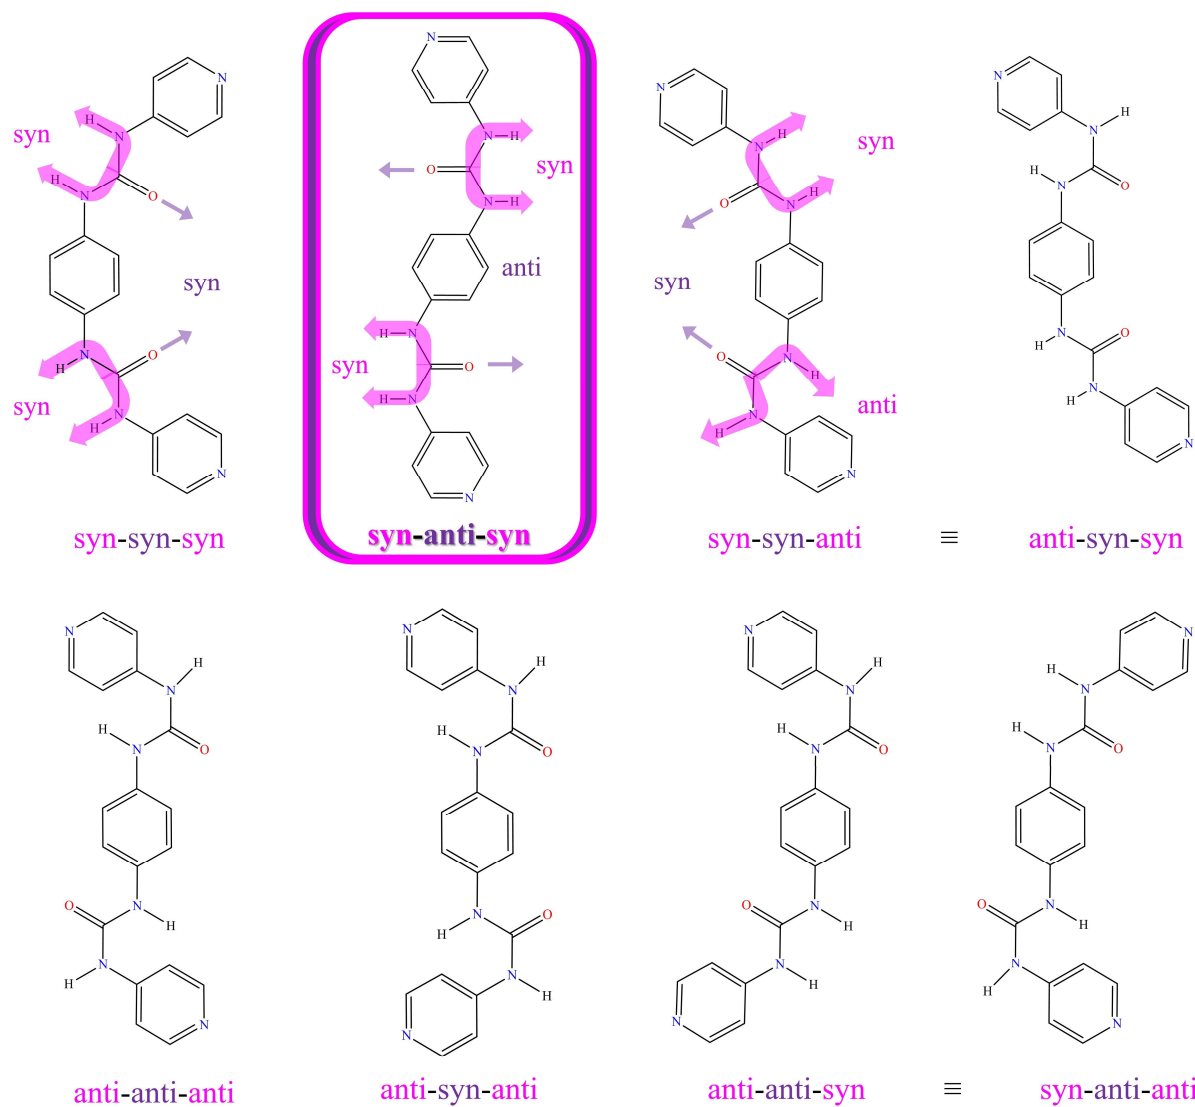

**Fig. S7** Plausible conformational isomers for **4,4-pbubp**.

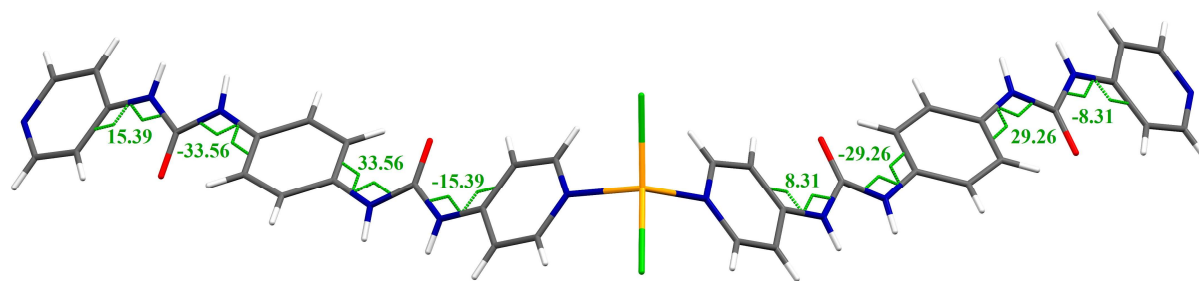

**Fig. S8** The dihedral angles between pyridyl rings and urea moieties and between the aromatic rings and the urea moieties of **CP1**.

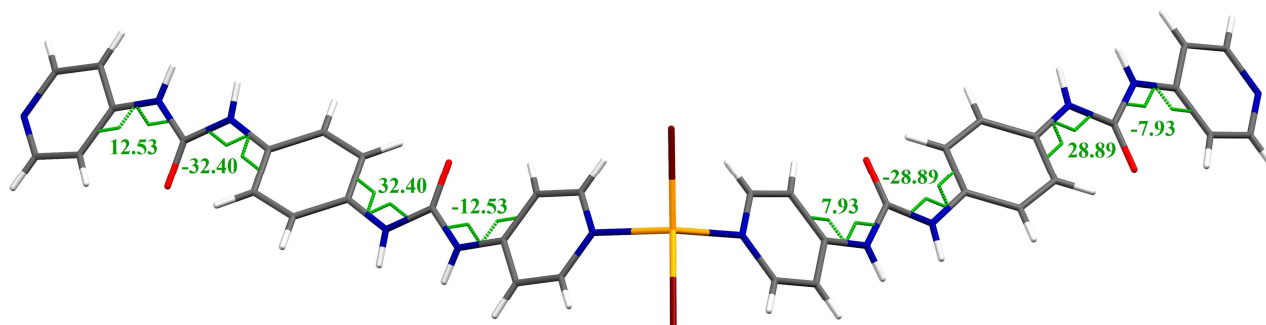

**Fig. S9** The dihedral angles between pyridyl rings and urea moieties and between the aromatic rings and the urea moieties of **CP2**.

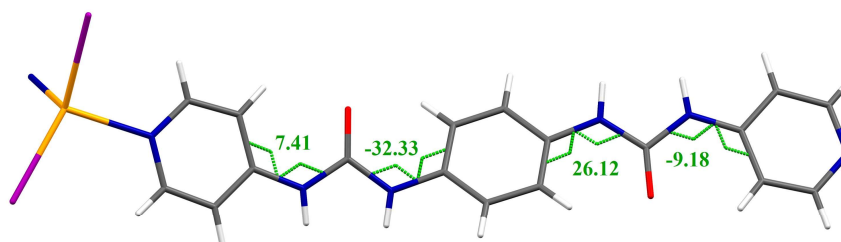

**Fig. S10** The dihedral angles between pyridyl rings and urea moieties and between the aromatic rings and the urea moieties of **CP3**.

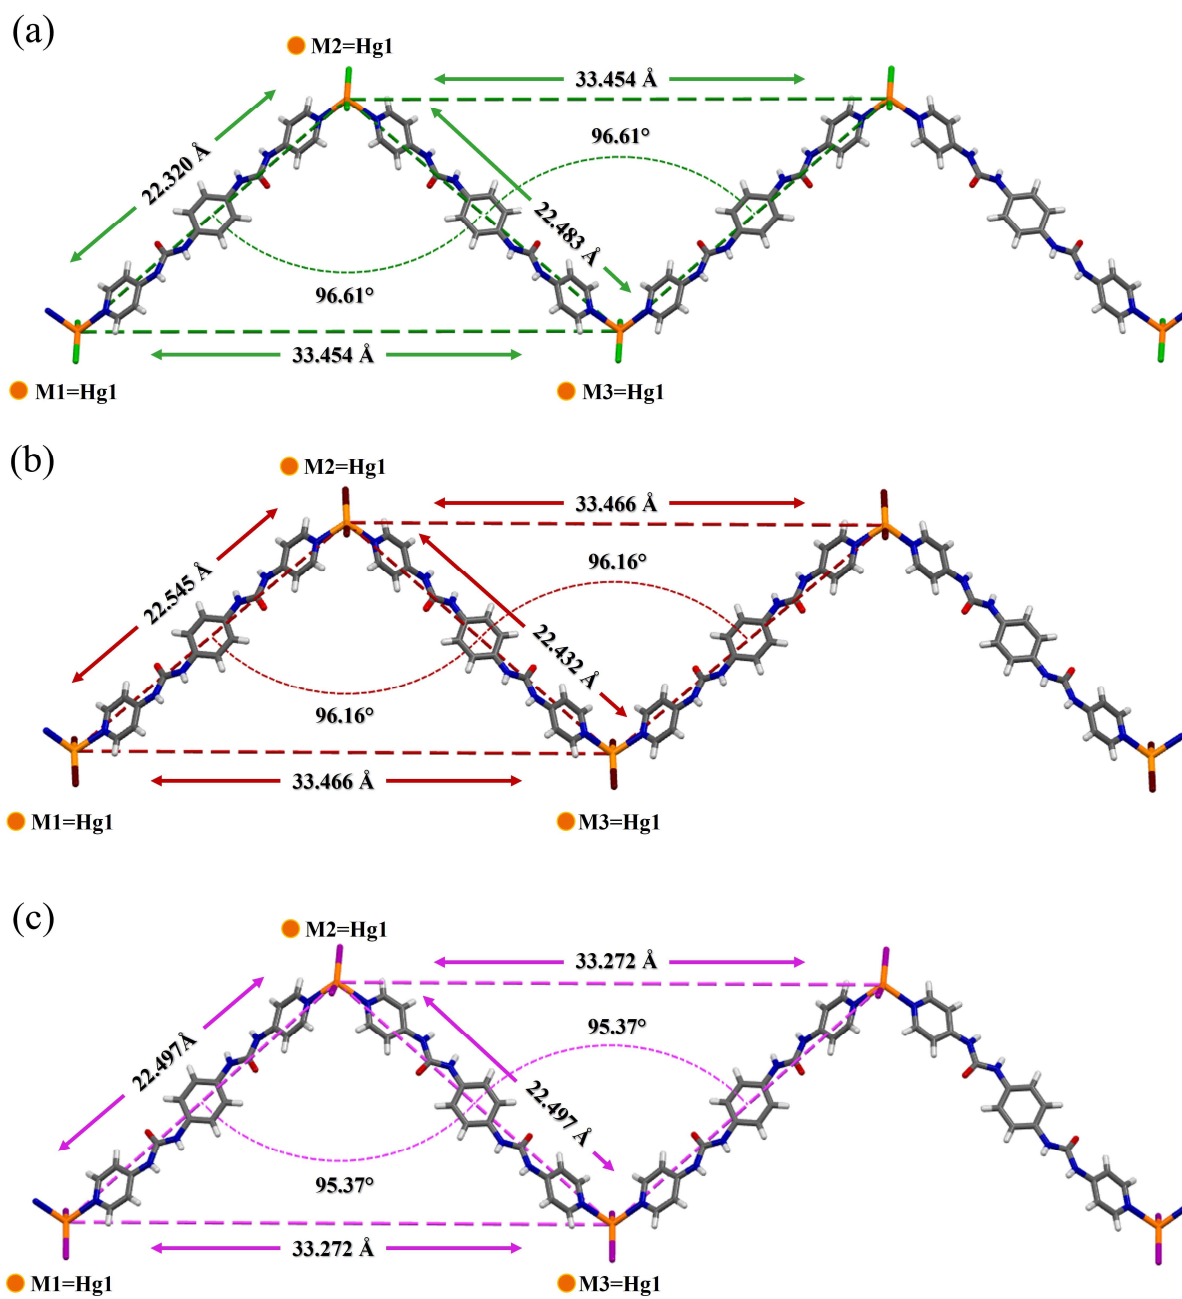

**Fig. S11** Hg...Hg distances [Å] and Hg...Hg...Hg angles [°] in zig-zag chains of (a) CP1, (b) CP2 and (c) CP3.

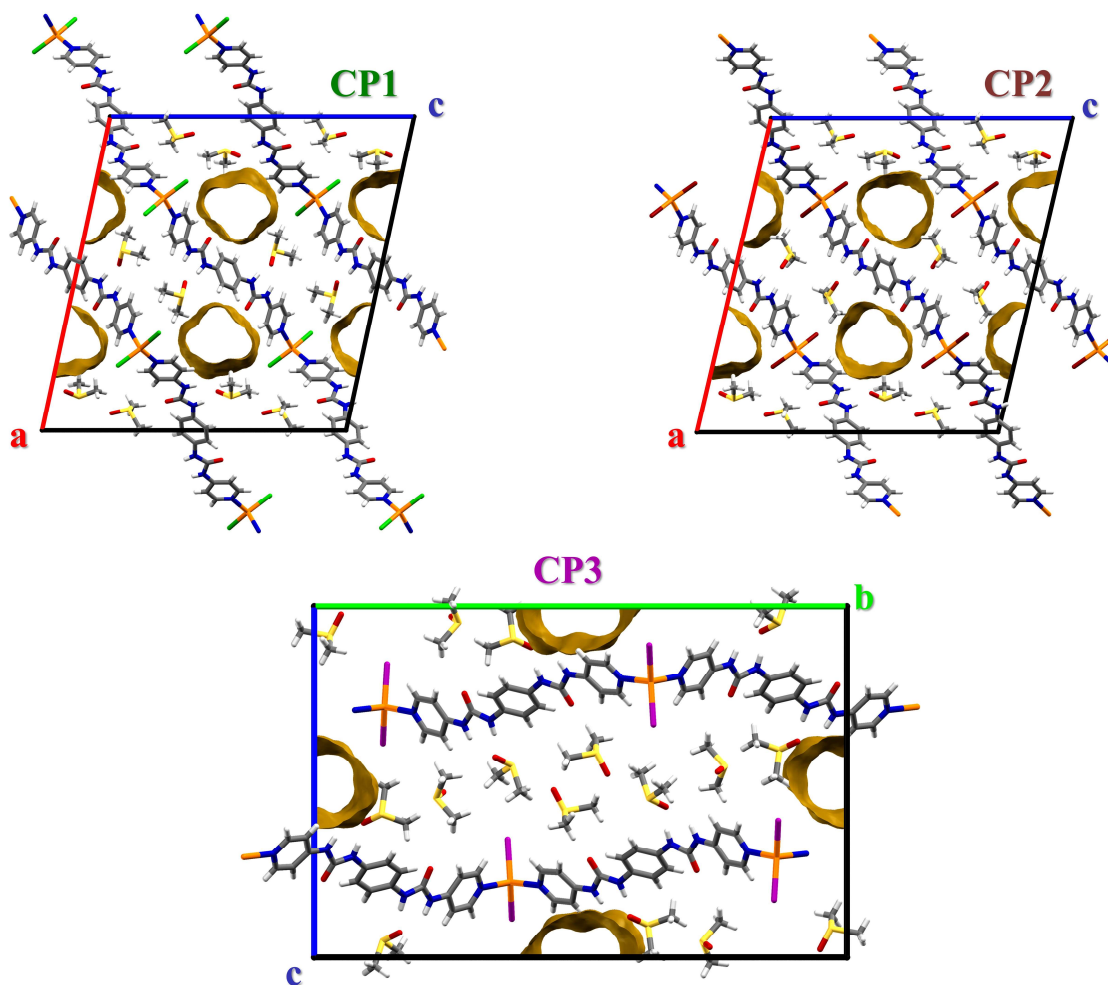

**Fig. S12** View of the channels (location of disordered DMSO solvent molecules) in CP1 and CP2 along *b*-axis and in CP3 along *a*-axis.

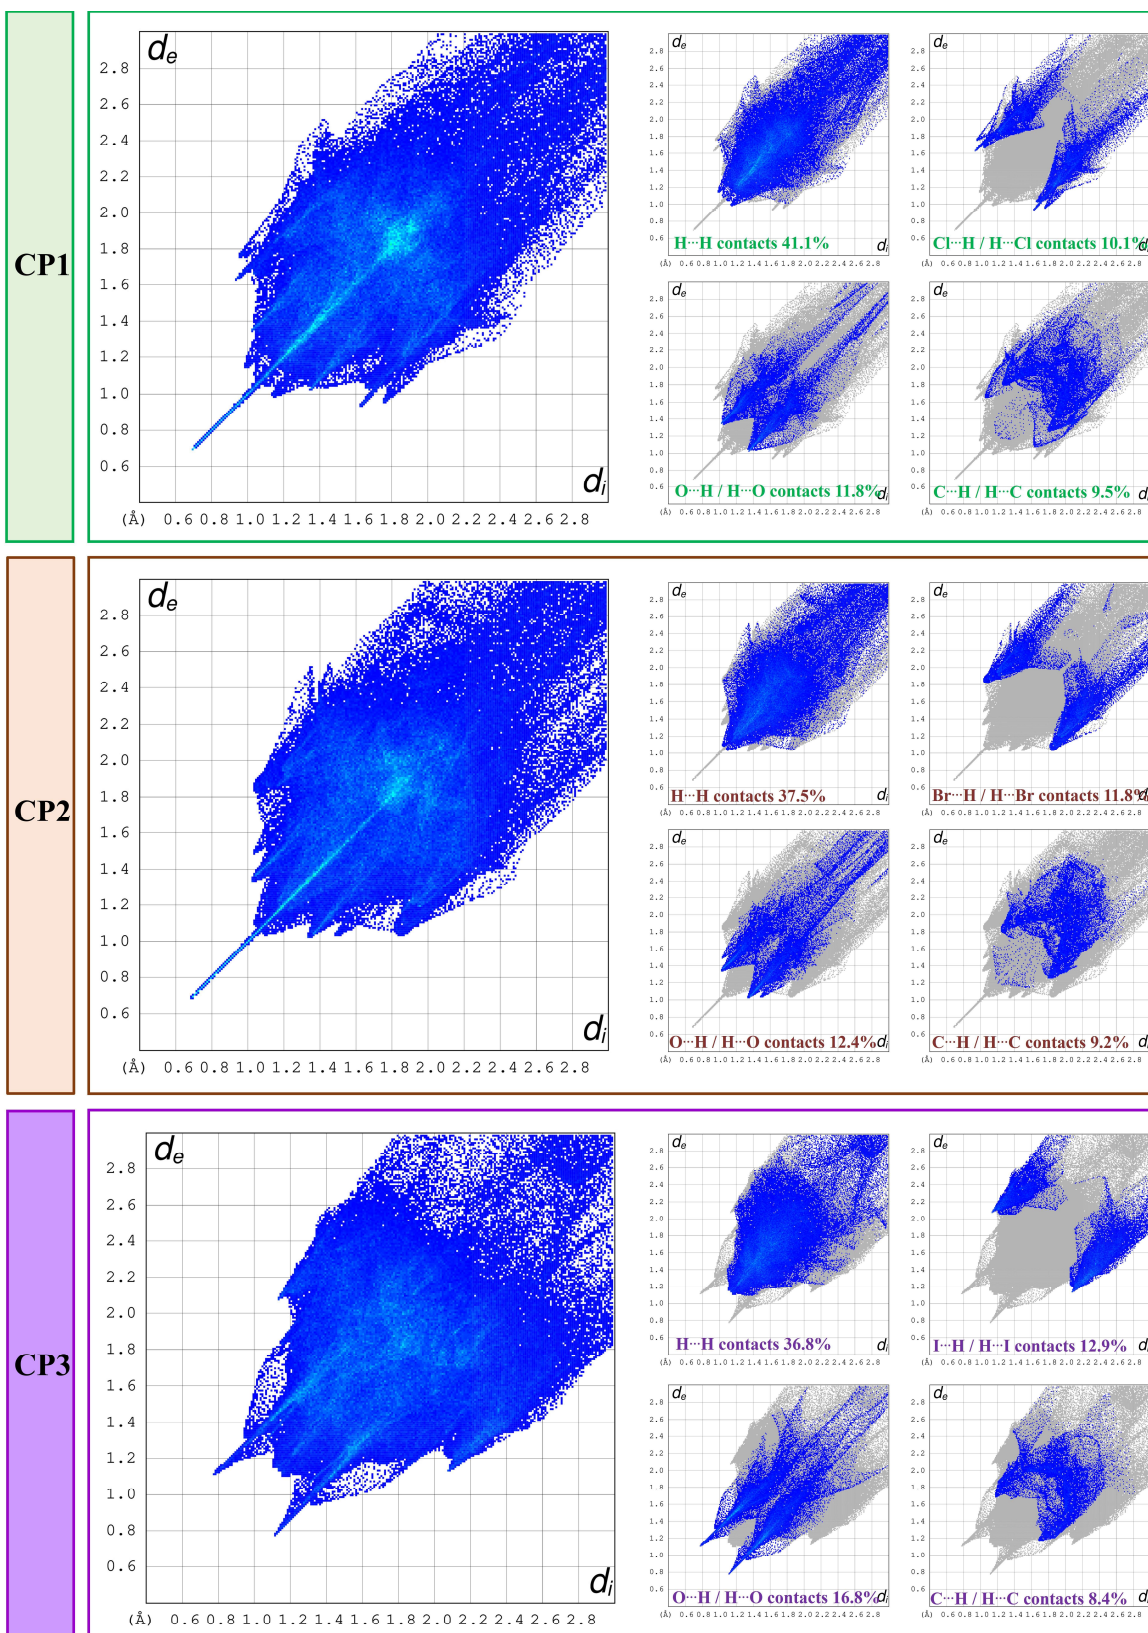

**Fig. S13** 2D fingerprint plots for CP1, CP2 and CP3: Full (left) and resolved into H...H, O...H/H...O, X...H/H...X and C...H/H...C contacts. These plots illustrate the percentages of various contacts contributing to the overall Hirshfeld surface area of the molecules.

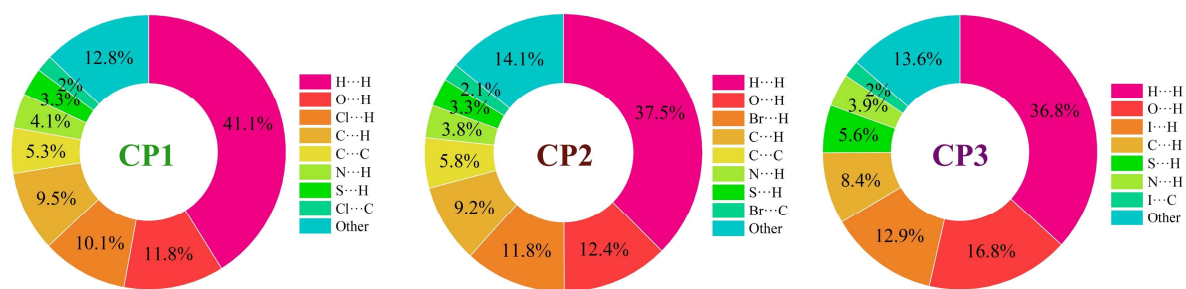

**Fig. S14** Distribution of the intermolecular contacts base on Hirshfeld surface analysis for **CP1**, **CP2** and **CP3**.

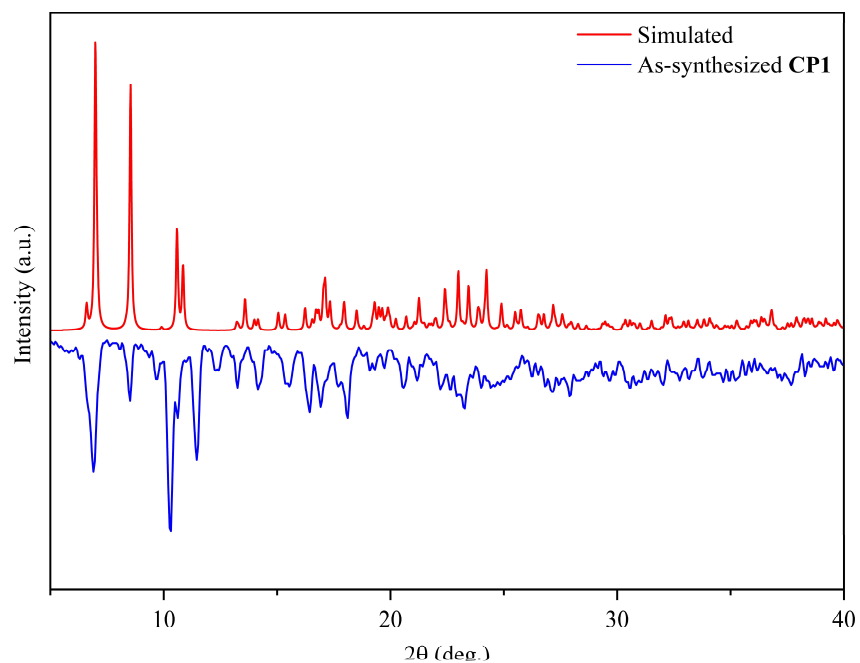

**Fig. S15** PXRD patterns of **CP1**. Red: Simulated from the X-ray single crystal data; Blue: observed for the as-synthesized solids.

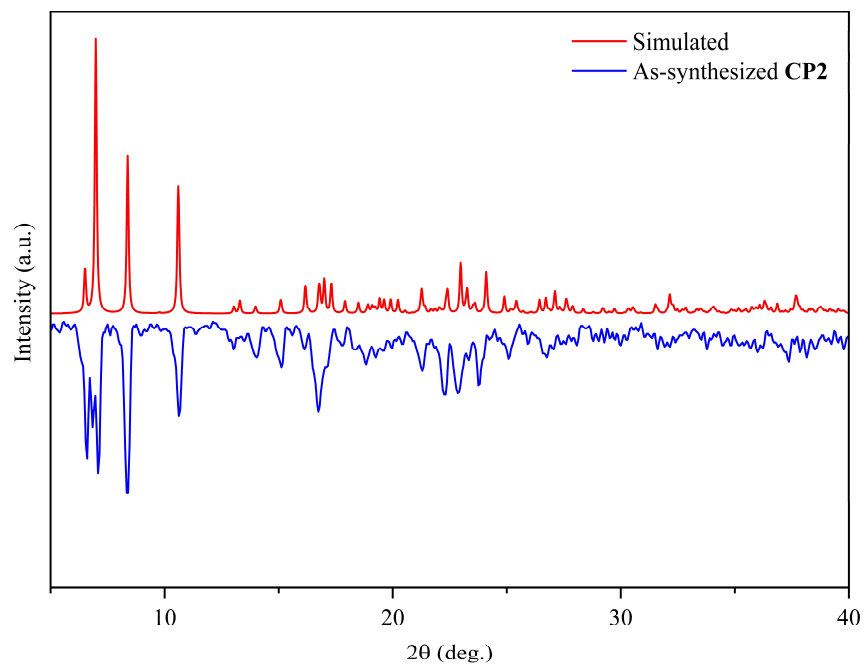

**Fig. S16** PXRD patterns of **CP2**. Red: Simulated from the X-ray single crystal data; Blue: observed for the as-synthesized solids.



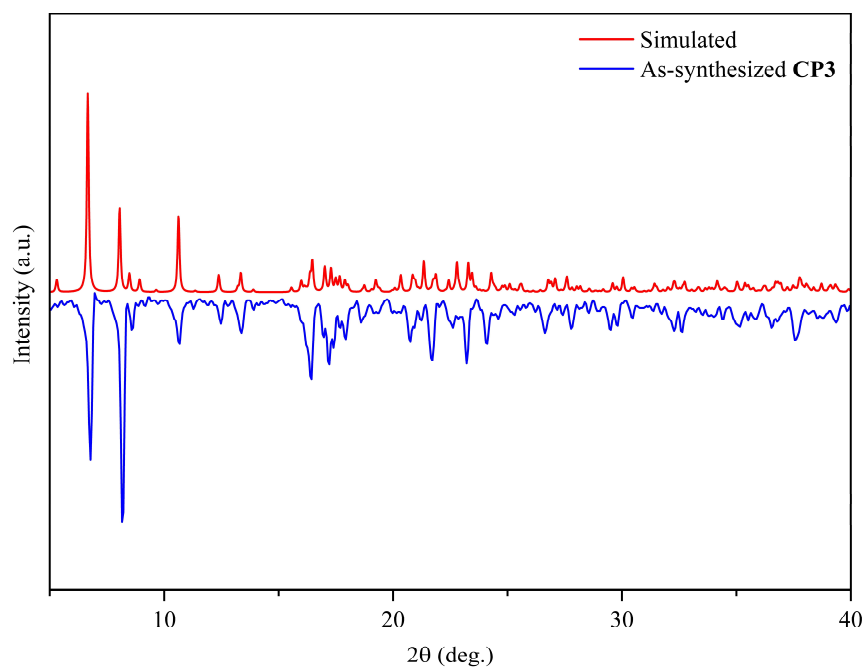

**Fig. S17** PXR D patterns of **CP3**. Red: Simulated from the X-ray single crystal data; Blue: observed for the as-synthesized solids.

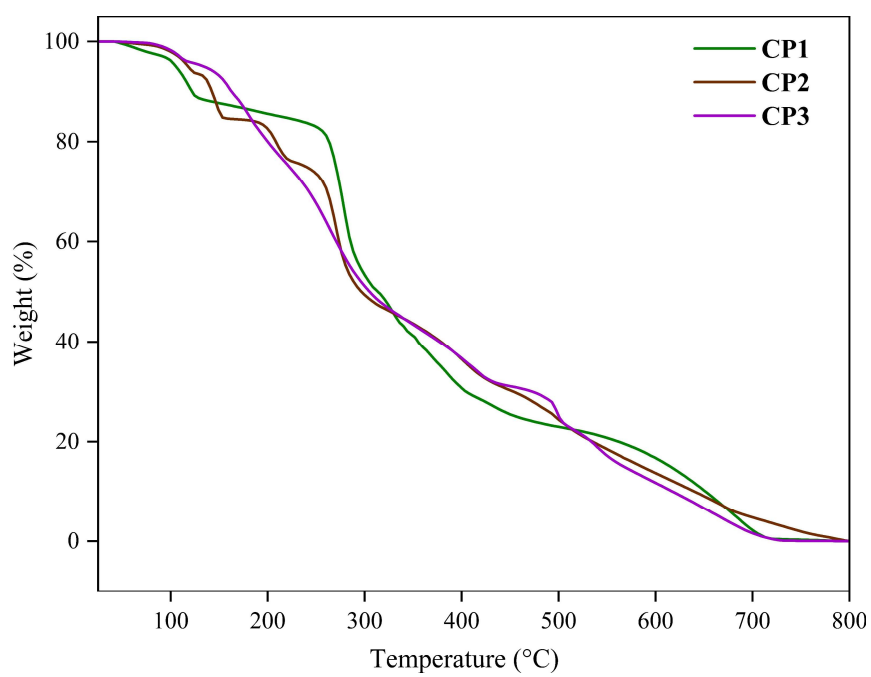

**Fig. S18** TGA curves of **CP1**, **CP2** and **CP3**.

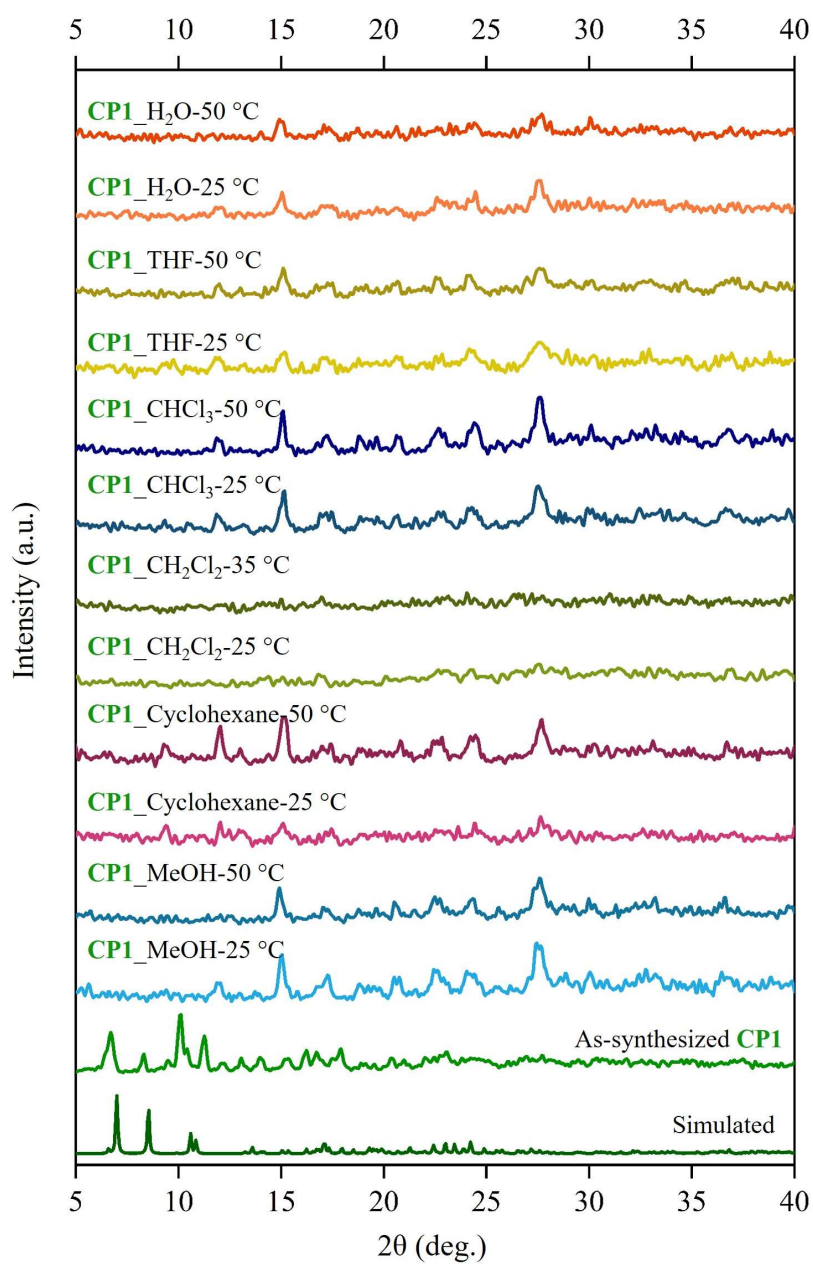

**Fig. S19** PXRD patterns of **CP1**: simulated, as-synthesized, and after immersion in H<sub>2</sub>O and different organic solvents for 1 h, at 25 and 50 °C.

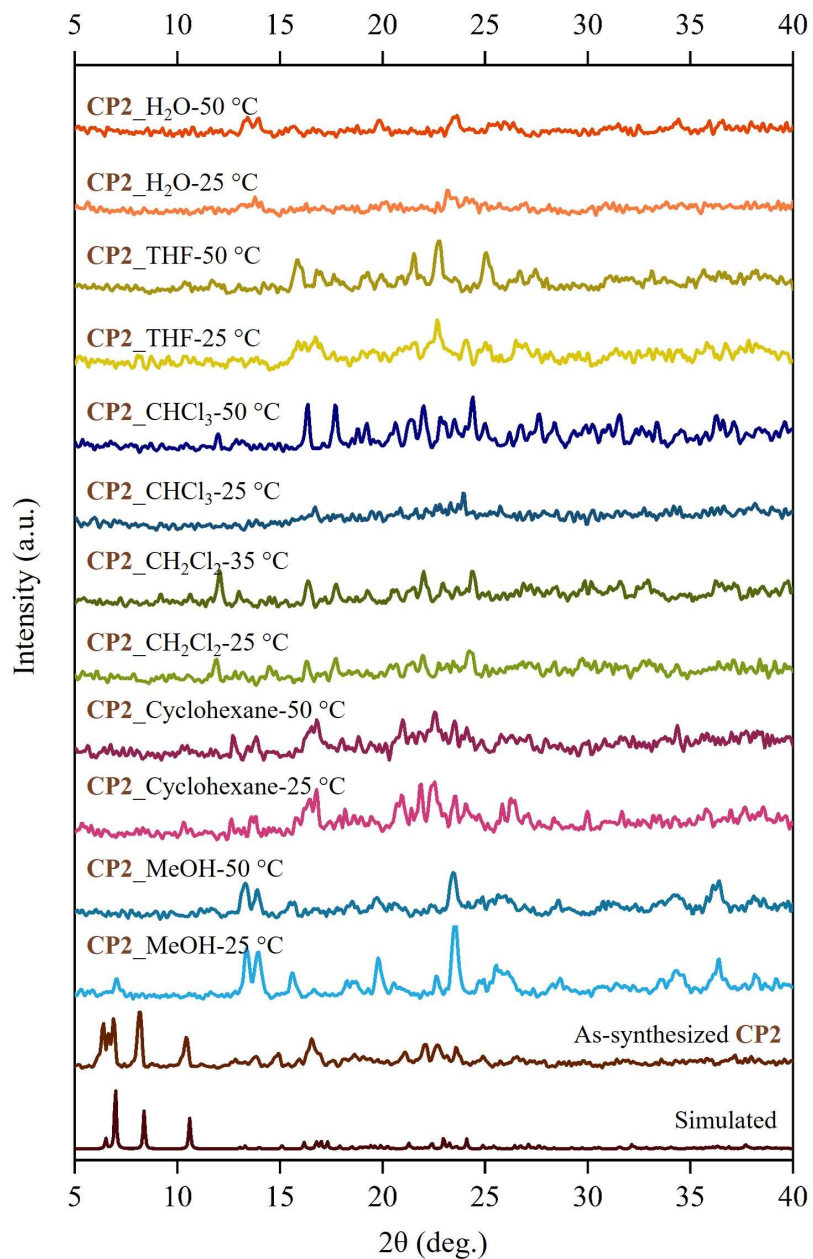

**Fig. S20** PXR D patterns of CP2: simulated, as-synthesized, and after immersion in H<sub>2</sub>O and different organic solvents for 1 h, at 25 and 50 °C.

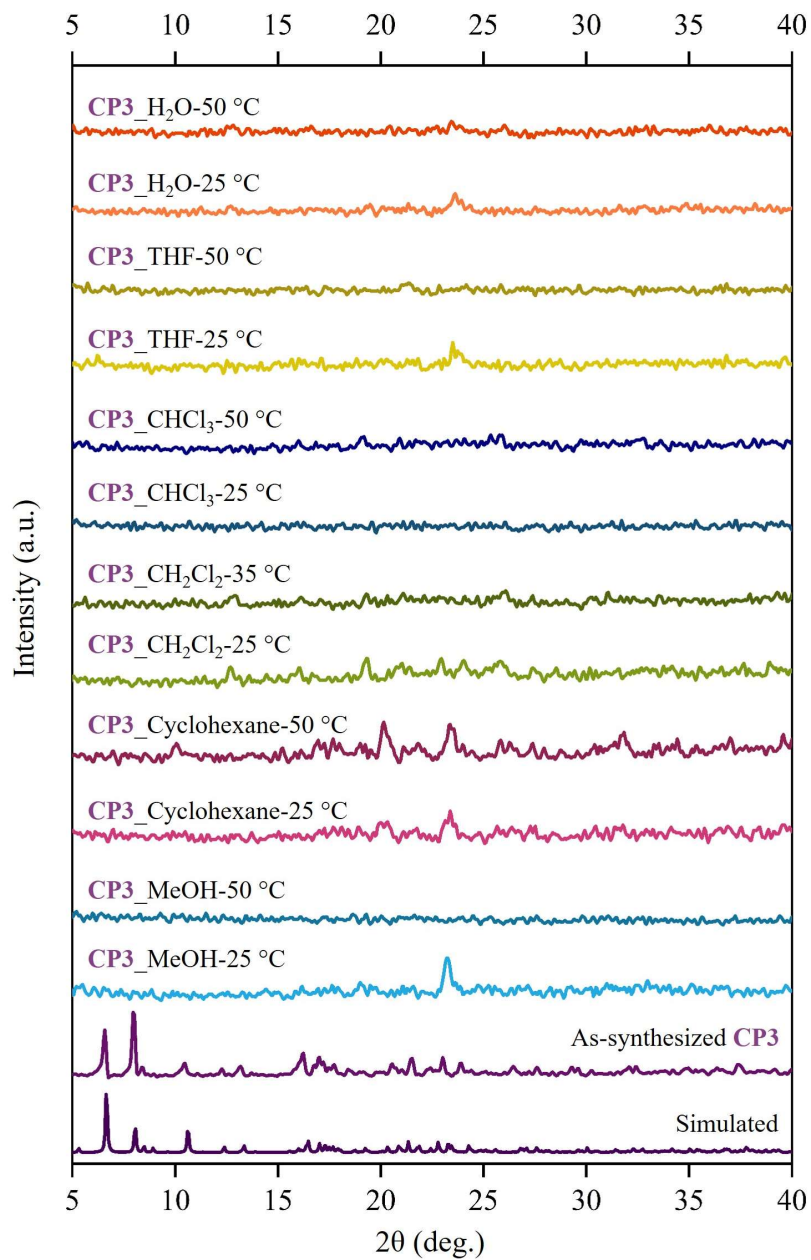

**Fig S21** PXRD patterns of **CP3**: simulated, as-synthesized, and after immersion in H<sub>2</sub>O and different organic solvents for 1 h, at 25 and 50 °C.

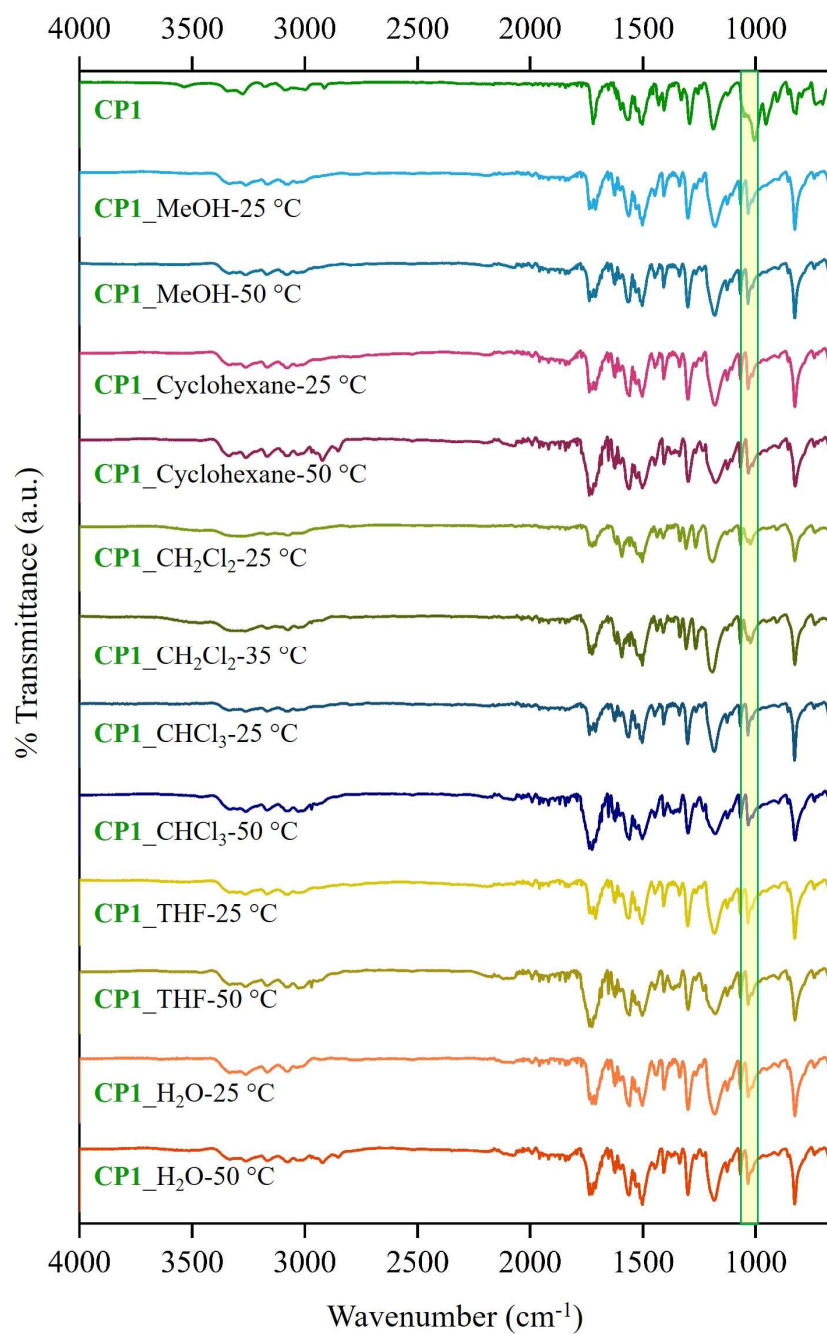

**Fig S22** ATR-FTIR spectra of **CP1**: as-synthesized, and after immersion in H<sub>2</sub>O and different organic solvents for 1 h, at 25 and 50 °C.

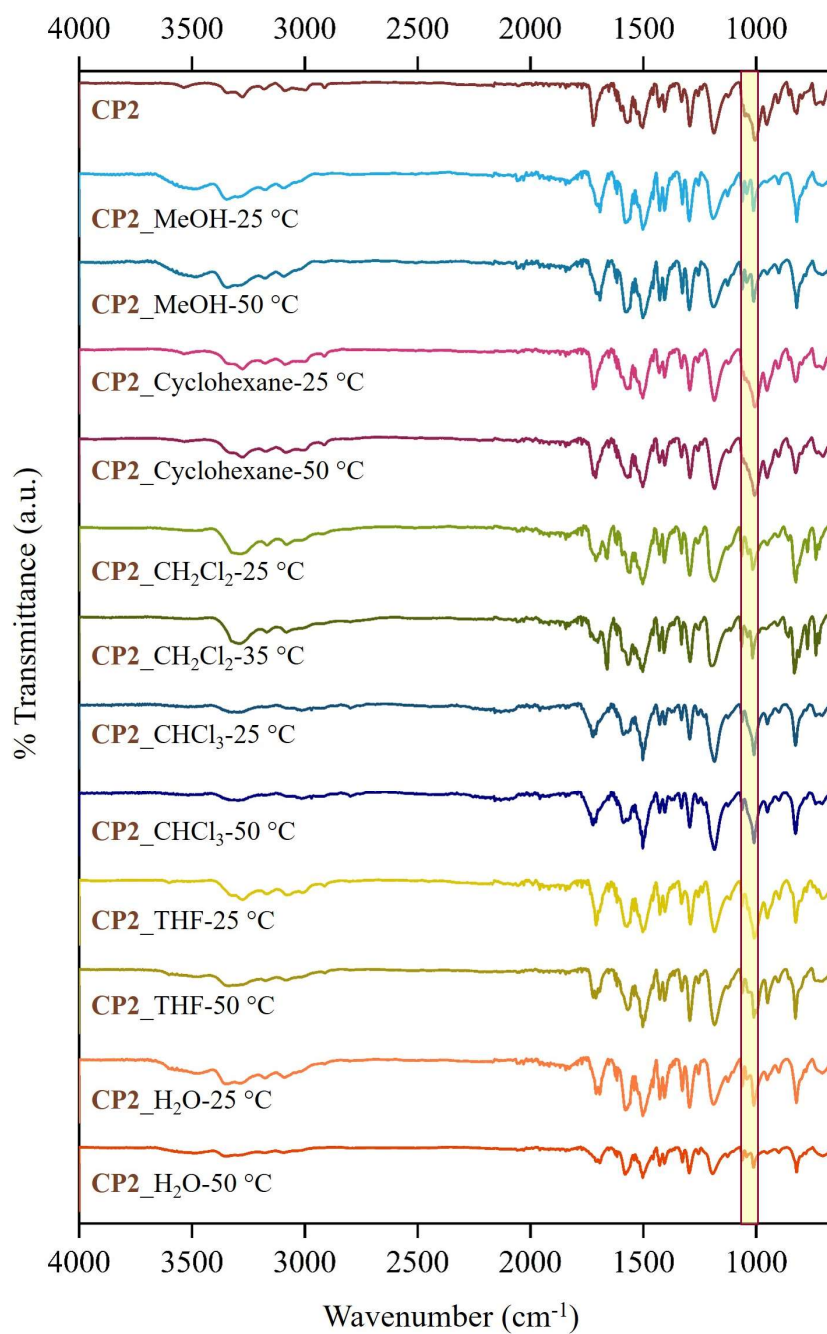

**Fig S23** ATR-FTIR spectra of CP2: as-synthesized, and after immersion in H<sub>2</sub>O and different organic solvents for 1 h, at 25 and 50 °C.

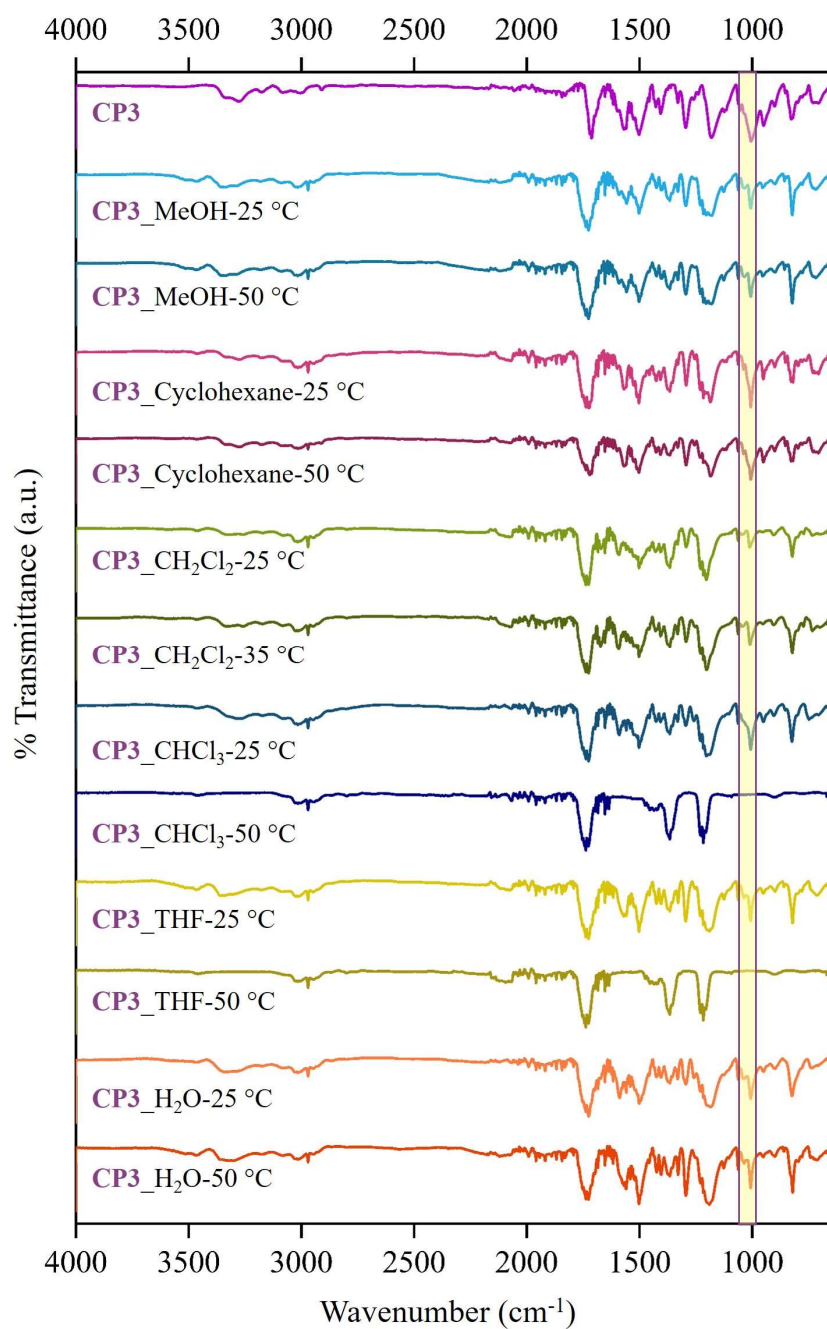

**Fig S24** ATR-FTIR spectra of **CP3**: as-synthesized, and after immersion in H<sub>2</sub>O and different organic solvents for 1 h, at 25 and 50 °C.



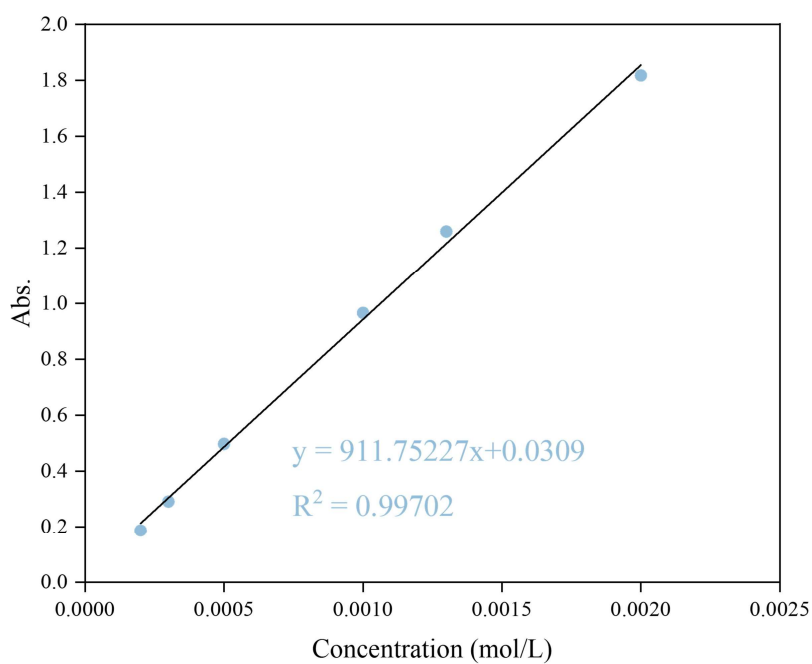

**Fig. S25** Calibration plot of standard iodine in cyclohexane by UV-Vis spectra.

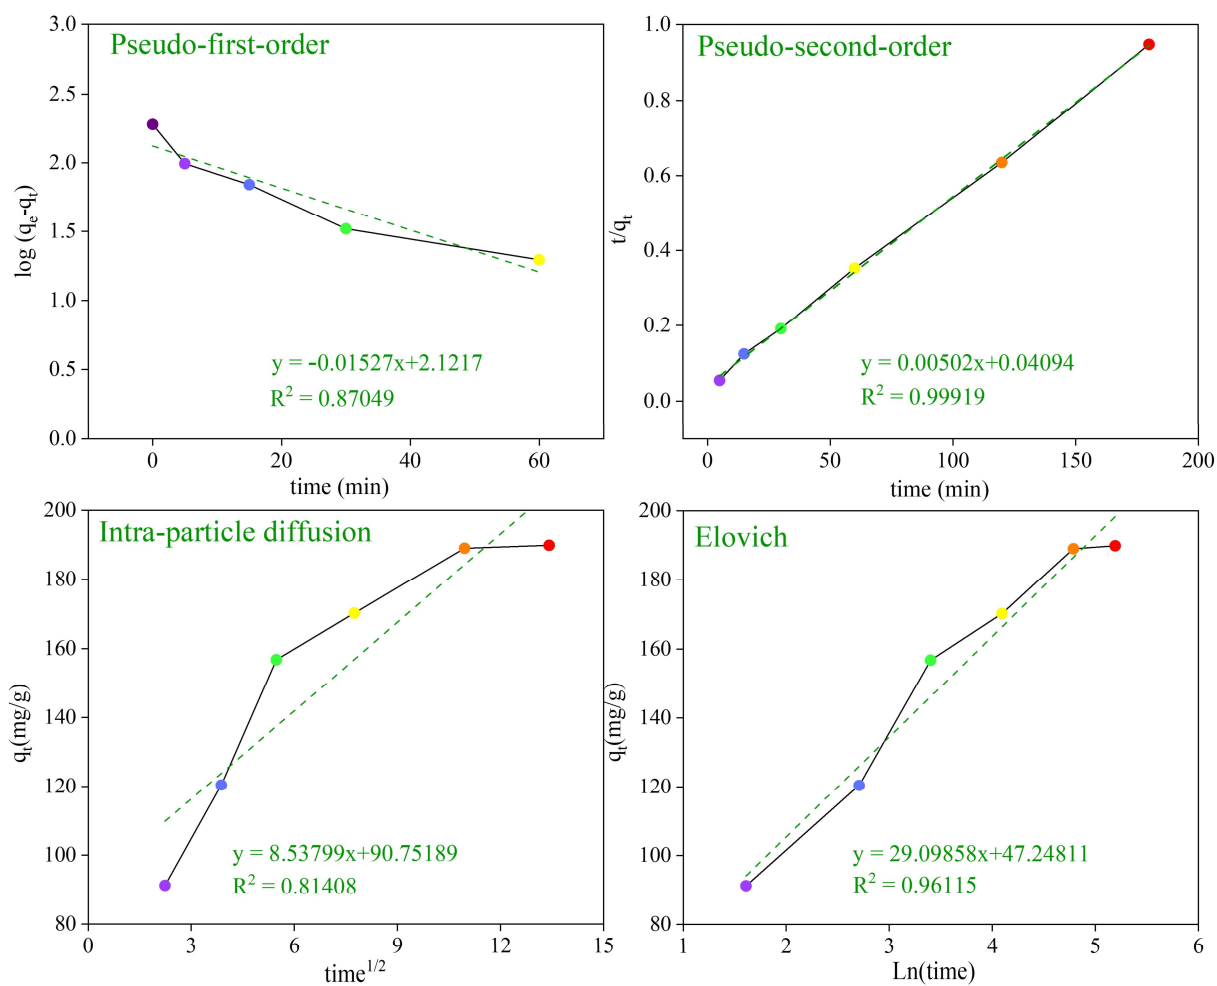

**Fig. S26** The pseudo-first-order, pseudo-second-order, intraparticle diffusion, and Elovich models for the uptake of I<sub>2</sub> by compound CP1 at 0.005 M concentration of solution.

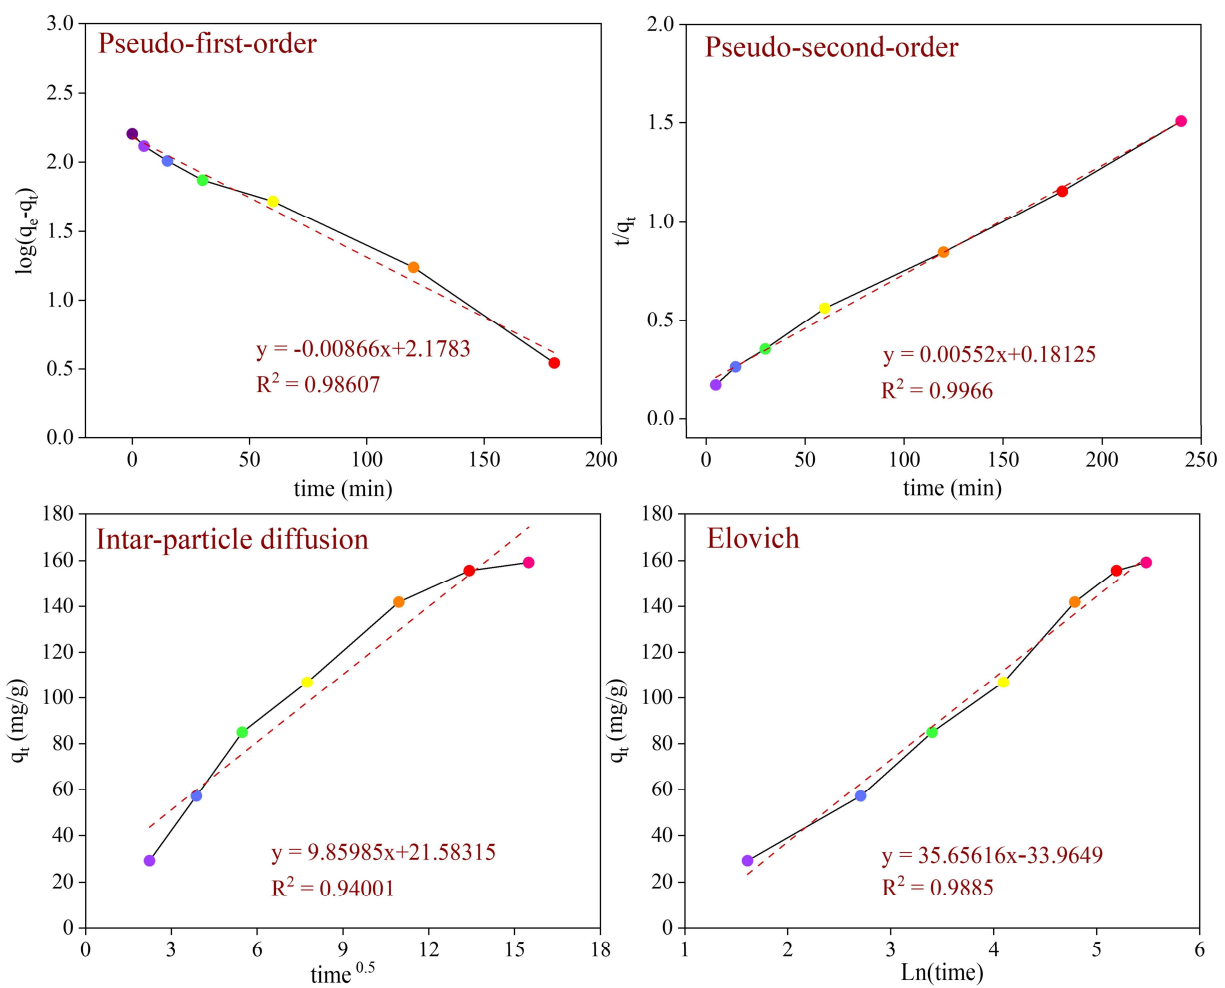

**Fig. S27** The pseudo-first-order, pseudo-second-order, intraparticle diffusion, and Elovich models for the uptake of I<sub>2</sub> by compound CP<sub>2</sub> at 0.005 M concentration of solution.

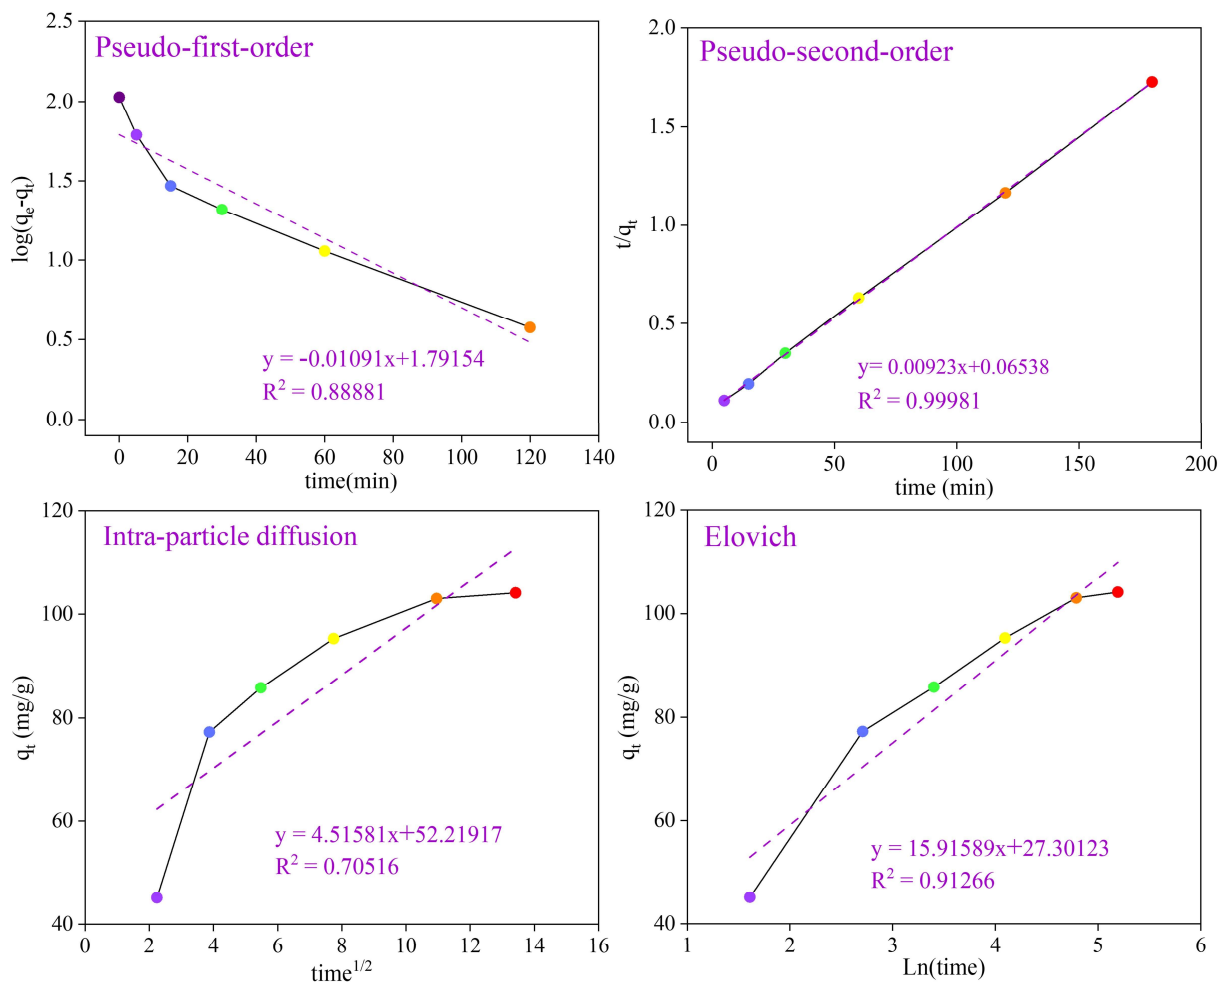

**Fig. S28** The pseudo-first-order, pseudo-second-order, intraparticle diffusion, and Elovich models for the uptake of I<sub>2</sub> by compound CP3 at 0.005 M concentration of solution.

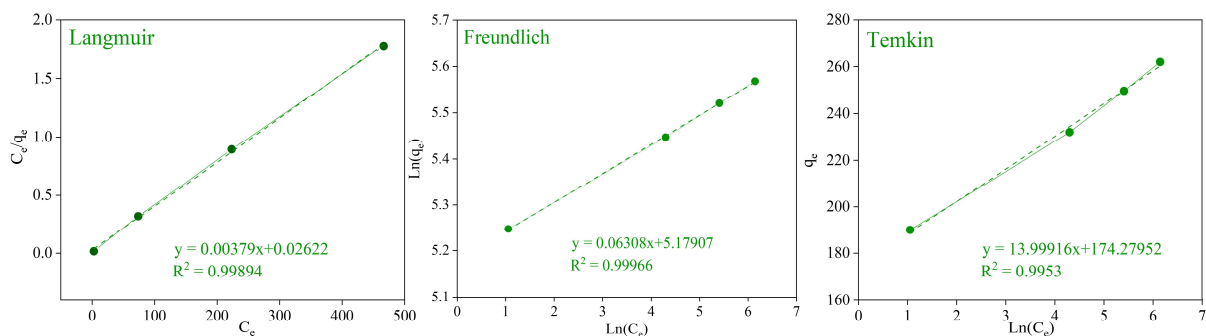

**Fig. S29** The Langmuir, Temkin, and Freundlich isotherm models for compound CP1.

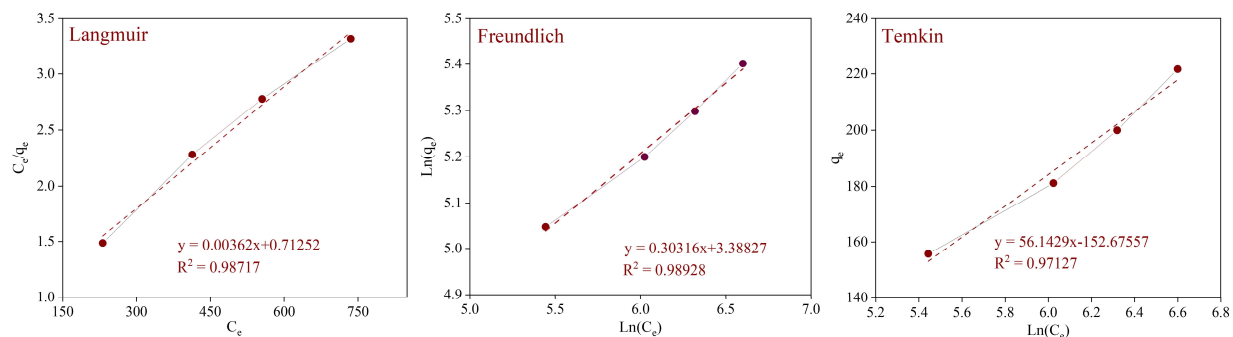

**Fig. S30** The Langmuir, Temkin, and Freundlich isotherm models for compound CP2.

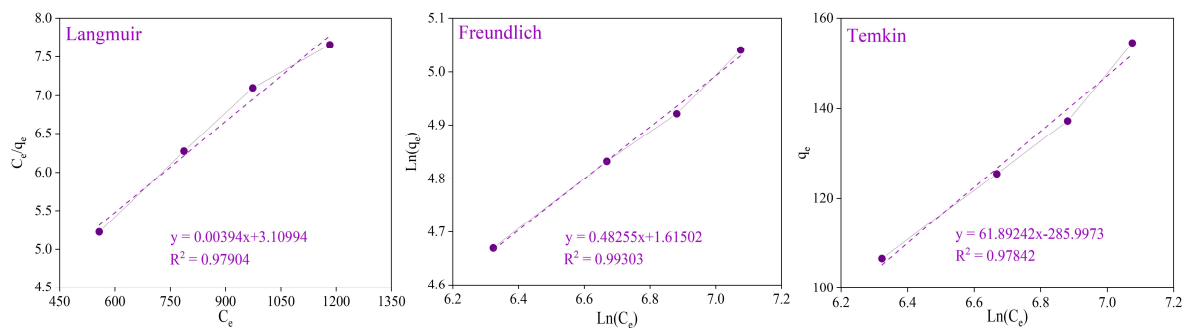

**Fig. S31** The Langmuir, Temkin, and Freundlich isotherm models for compound CP3.

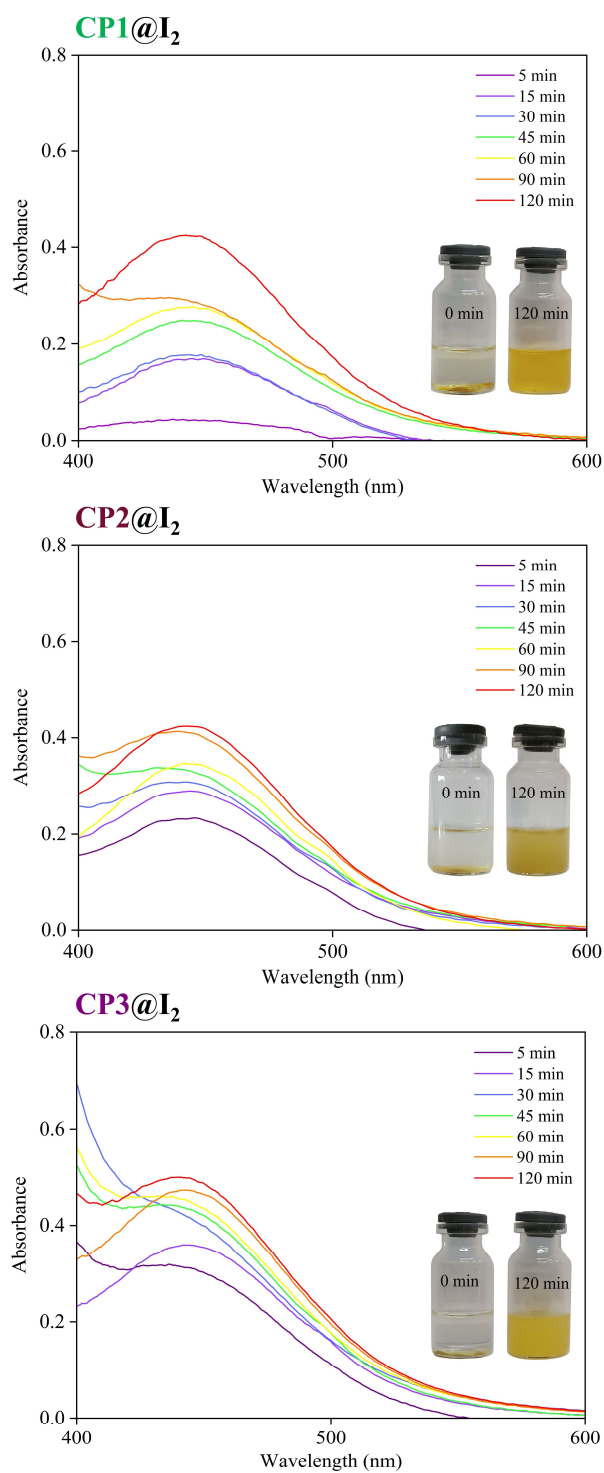

**Fig. S32** The UV-Vis spectra of compounds CP1@I<sub>2</sub>, CP2@I<sub>2</sub> and CP3@I<sub>2</sub> immersed in 5 mL ethanol and the photograph of the releasing process at the beginning and after 120 min.

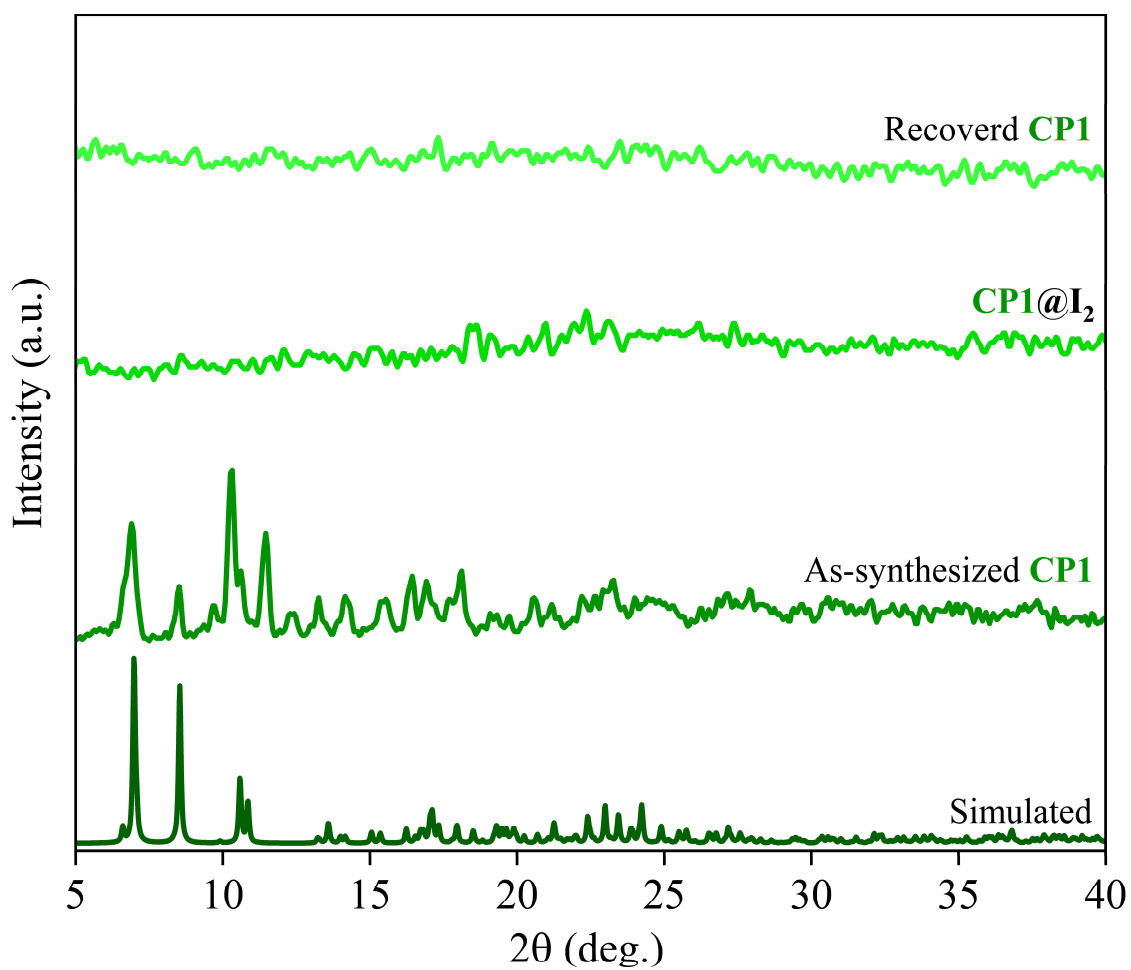

**Fig. S33** Comparison between the simulation powder X-ray diffraction patterns of the CP1, before iodine uptake, the CP1@I<sub>2</sub> and recovered CP1.

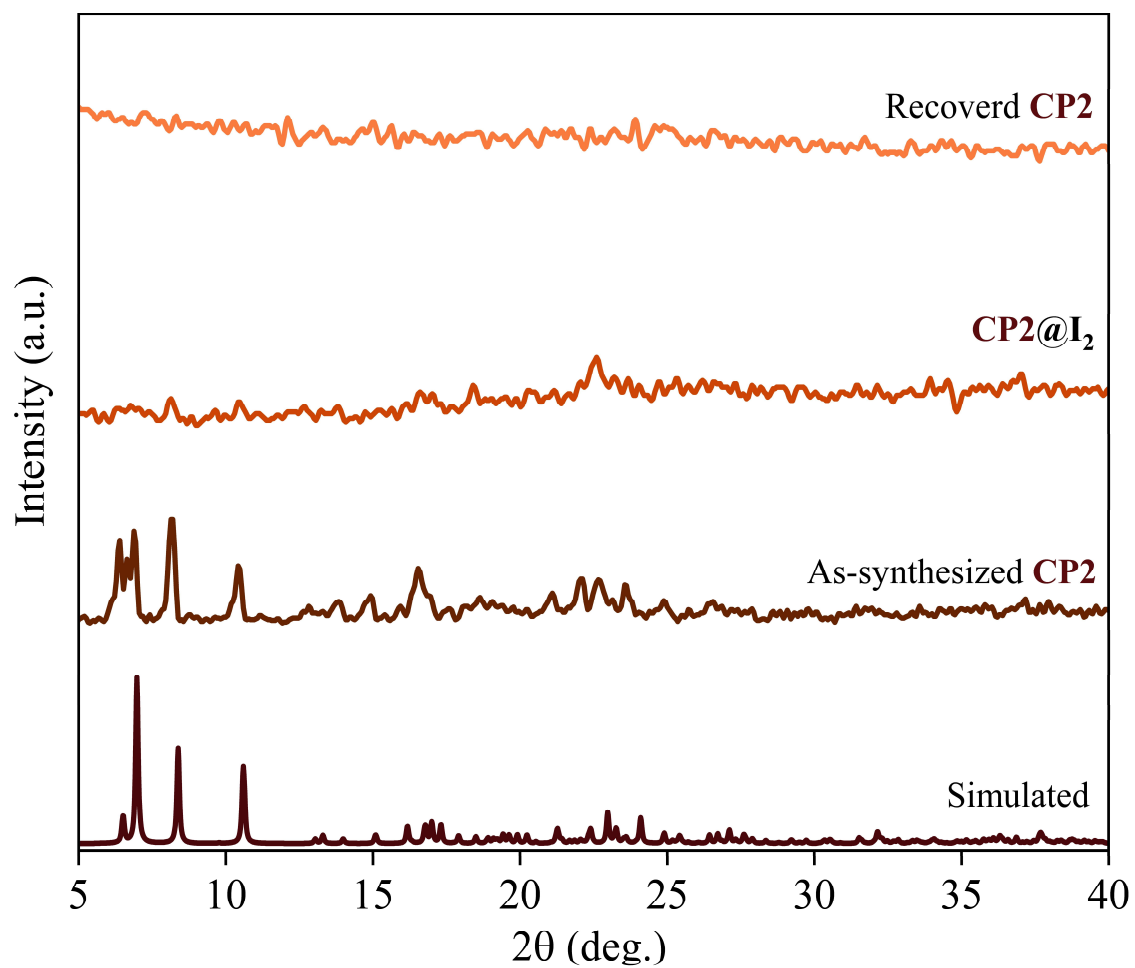

**Fig. S34** Comparison between the simulation powder X-ray diffraction patterns of the CP2, before iodine uptake, the CP2@I<sub>2</sub> and recovered CP2.



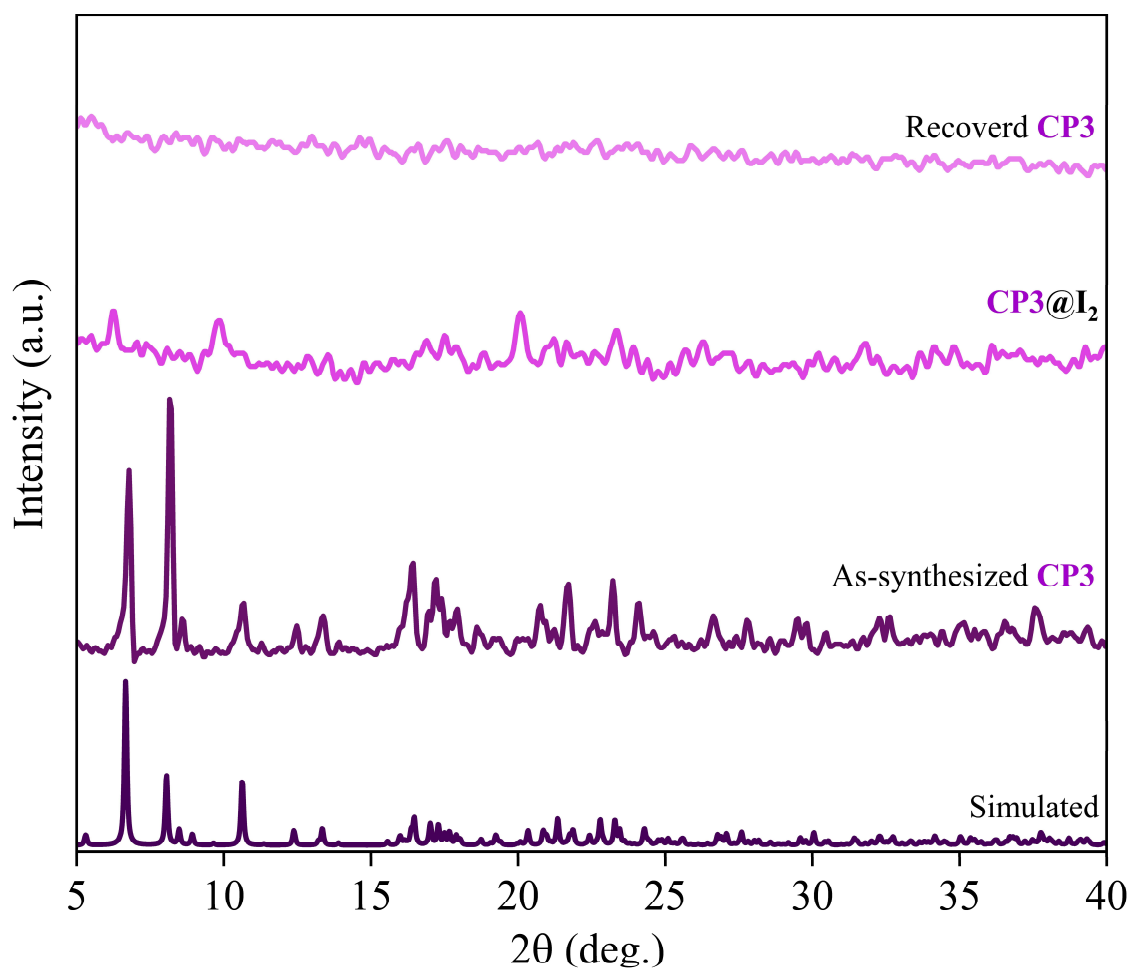

**Fig. S35** Comparison between the simulation powder X-ray diffraction patterns of the CP3, before iodine uptake, the CP3@I<sub>2</sub> and recovered CP3.

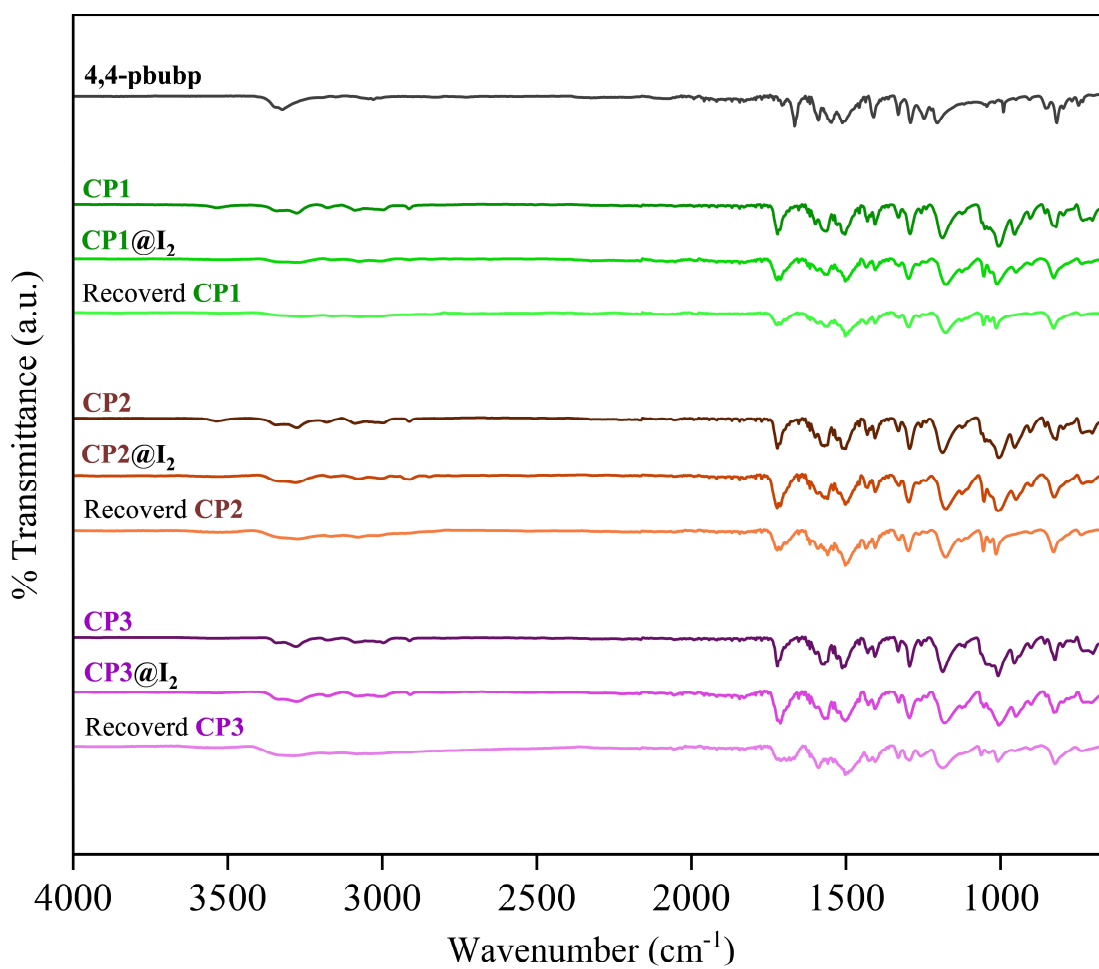

**Fig. S36** ATR-FTIR spectra of **4,4-pbubp**, compounds **CP1**, **CP2** and **CP3** before and after iodine uptake.

**Table S1** Selected bond lengths [ $\text{\AA}$ ] and angles [ $^\circ$ ] for **CP1**.

|                   |            |                   |           |
|-------------------|------------|-------------------|-----------|
| Hg(1)—Cl(1)       | 2.3990(10) | Cl(1)—Hg(1)—N(1A) | 101.24(8) |
| Hg(1)—Cl(2)       | 2.3925(12) | Cl(1)—Hg(1)—N(1B) | 102.81(7) |
| Hg(1)—N(1A)       | 2.345(3)   | Cl(2)—Hg(1)—N(1A) | 98.59(8)  |
| Hg(1)—N(1B)       | 2.309(3)   | Cl(2)—Hg(1)—N(1B) | 103.70(8) |
| Cl(1)—Hg(1)—Cl(2) | 143.41(3)  | N(1A)—Hg(1)—N(1B) | 99.80(9)  |

**Table S2** Selected bond lengths [ $\text{\AA}$ ] and angles [ $^\circ$ ] for **CP2**.

|                   |           |                   |            |
|-------------------|-----------|-------------------|------------|
| Hg(1)—Br(1)       | 2.5228(8) | Br(1)—Hg(1)—N(1A) | 102.57(10) |
| Hg(1)—Br(2)       | 2.5181(7) | Br(1)—Hg(1)—N(1B) | 98.19(10)  |
| Hg(1)—N(1A)       | 2.318(4)  | Br(2)—Hg(1)—N(1A) | 103.15(10) |
| Hg(1)—N(1B)       | 2.354(4)  | Br(2)—Hg(1)—N(1B) | 102.22(10) |
| Br(1)—Hg(1)—Br(2) | 143.04(2) | N(1A)—Hg(1)—N(1B) | 101.42(13) |

**Table S3** Selected bond lengths [ $\text{\AA}$ ] and angles [ $^\circ$ ] for **CP3**.

|                                                   |           |                               |          |
|---------------------------------------------------|-----------|-------------------------------|----------|
| Hg(1)—I(1)                                        | 2.6754(8) | I(1)—Hg(1)—N(1)               | 102.8(2) |
| Hg(1)—I(2)                                        | 2.6944(8) | I(1)—Hg(1)—N(6) <sup>#1</sup> | 102.6(2) |
| Hg(1)—N(1)                                        | 2.350(7)  | I(2)—Hg(1)—N(1)               | 99.8(2)  |
| Hg(1)—N(1)                                        | 2.362(7)  | I(2)—Hg(1)—N(6) <sup>#1</sup> | 101.8(2) |
| I(1)—Hg(1)—I(2)                                   | 142.19(2) | N(1)—Hg(1)—N(6) <sup>#1</sup> | 101.9(2) |
| Symmetry codes: #1: $-x + 1, y + 1/2, -z + 3/2$ . |           |                               |          |

**Table S4** Geometry of intermolecular hydrogen bonds (D–H···A) for **CP1-CP3**.

| Compound                                                                                                           | D–H···A                                   | d(D–H) / Å | d(H···A) / Å | d(D···A) / Å | ∠ D–H···A/deg. |
|--------------------------------------------------------------------------------------------------------------------|-------------------------------------------|------------|--------------|--------------|----------------|
| <b>CP1</b>                                                                                                         | N2A–H2AA···O1E                            | 0.88       | 1.94         | 2.719(9)     | 147            |
|                                                                                                                    | N3A–H3AA···O1E                            | 0.88       | 2.00         | 2.786(10)    | 149            |
|                                                                                                                    | N2B–H2BA···O1D                            | 0.88       | 2.03         | 2.836(4)     | 152            |
|                                                                                                                    | N3B–H3BA···O1D                            | 0.88       | 1.98         | 2.802(4)     | 156            |
|                                                                                                                    | C1C–H1C2 <sup>a</sup> ···O8B              | 0.98       | 2.46         | 3.229(4)     | 135            |
|                                                                                                                    | C2C–H2C2 <sup>a</sup> ···O8B              | 0.98       | 2.54         | 3.297(4)     | 134            |
|                                                                                                                    | C2C–H2C1 <sup>a</sup> ···O1C <sup>b</sup> | 0.98       | 2.48         | 3.446(4)     | 168            |
|                                                                                                                    | C2C–H2C3 <sup>b</sup> ···O1C <sup>a</sup> | 0.98       | 2.47         | 3.401(4)     | 159            |
|                                                                                                                    | C1E–H1E3···Cl1 <sup>c</sup>               | 0.98       | 2.79         | 3.671        | 149            |
| C2E–H2E3···Cl1 <sup>c</sup>                                                                                        | 0.98                                      | 2.80       | 3.678        | 149          |                |
| Symmetry codes: <i>a</i> : x, y – 1, z <i>b</i> : –x, y – 3/2, –z + 3/2 <i>c</i> : –x + 1, y – 1/2, –z + 3/2       |                                           |            |              |              |                |
| <b>CP2</b>                                                                                                         | N2A–H2AA···O1D                            | 0.88       | 2.02         | 2.839(5)     | 154            |
|                                                                                                                    | N3A–H3AA···O1D                            | 0.88       | 1.97         | 2.802(6)     | 157            |
|                                                                                                                    | N2B–H2BA···O1E                            | 0.88       | 1.96         | 2.808(8)     | 161            |
|                                                                                                                    | N3B–H3BA···O1E                            | 0.88       | 2.08         | 2.903(10)    | 155            |
|                                                                                                                    | C1C–H1CB <sup>a</sup> ···O1A              | 0.98       | 2.56         | 3.309(6)     | 133            |
|                                                                                                                    | C2C–H2CB <sup>a</sup> ···O1A              | 0.98       | 2.48         | 3.247(6)     | 135            |
|                                                                                                                    | C1C–H1CC <sup>a</sup> ···O1C <sup>b</sup> | 0.98       | 2.51         | 3.470(6)     | 167            |
|                                                                                                                    | C1C–H1CA <sup>b</sup> ···O1C <sup>a</sup> | 0.98       | 2.50         | 3.413(6)     | 156            |
|                                                                                                                    | C1E–H1ED···Br2 <sup>c</sup>               | 0.98       | 2.98         | 3.838        | 148            |
| C2E–H2EE···Br2 <sup>c</sup>                                                                                        | 0.98                                      | 3.05       | 3.846        | 140          |                |
| Symmetry codes: <i>a</i> : x, –y + 1/2, z – 1/2 <i>b</i> : –x + 2, –y, –z + 1 <i>c</i> : –x + 1, y – 1/2, –z + 1/2 |                                           |            |              |              |                |
| <b>CP3</b>                                                                                                         | N2–H2A···O1C                              | 0.88       | 2.04         | 2.851(11)    | 152            |
|                                                                                                                    | N3–H3A···O1C                              | 0.88       | 2.02         | 2.840(12)    | 155            |
|                                                                                                                    | N4–H4A···O1A <sup>a</sup>                 | 0.88       | 2.01         | 2.835(12)    | 156            |
|                                                                                                                    | N5–H5···O1A <sup>a</sup>                  | 0.88       | 2.07         | 2.873(11)    | 151            |
|                                                                                                                    | C1D–H1DB <sup>b</sup> ···O1D <sup>a</sup> | 0.98       | 2.46         | 3.405(13)    | 162            |
|                                                                                                                    | C1D–H1DB <sup>a</sup> ···O1D <sup>b</sup> | 0.98       | 2.72         | 3.689        | 171            |
|                                                                                                                    | C1B–H1BA <sup>a</sup> ···O1C              | 0.98       | 2.32         | 3.267(14)    | 164            |
|                                                                                                                    | C2D–H2DC <sup>b</sup> ···O2               | 0.98       | 2.44         | 3.255(15)    | 140            |
|                                                                                                                    | C1D–H1DC <sup>b</sup> ···O2               | 0.98       | 2.65         | 3.399        | 133            |
|                                                                                                                    | C1C–H1CA···O1B <sup>a</sup>               | 0.98       | 2.78         | 3.615        | 144            |
|                                                                                                                    | C2C–H2CC···O1D <sup>a</sup>               | 0.98       | 2.61         | 3.568        | 165            |
|                                                                                                                    | C1C–H2CC···I2 <sup>c</sup>                | 0.98       | 3.60         | 4.186        | 121            |
| C2C–H2CA···I2 <sup>c</sup>                                                                                         | 0.98                                      | 3.86       | 4.440        | 120          |                |
| Symmetry codes: <i>a</i> : x + 1, y, z <i>b</i> : –x, –y + 1, –z + 1 <i>c</i> : x, –y + 3/2, z – 1/2               |                                           |            |              |              |                |

**Table S5** Kinetics parameters for iodine uptake from the solution by **CP1**, **CP2** and **CP3** at room temperature.

| Kinetic models                  | Equations                                             | Parameters          | CP1                | CP2                  | CP3                  |
|---------------------------------|-------------------------------------------------------|---------------------|--------------------|----------------------|----------------------|
| <b>Pseudo-first-order</b>       | $q_t = q_e(1 - e^{-k_1 t})$                           | Adj. R <sup>2</sup> | 0.8705             | 0.9861               | 0.8888               |
|                                 |                                                       | q <sub>e</sub>      | 132.34             | 150.76               | 61.879               |
|                                 |                                                       | k <sub>1</sub>      | 0.0352             | 0.0199               | 0.0251               |
| <b>Pseudo-second-order</b>      | $q_t = \frac{q_e^2 k_2 t}{(1 + q_e k_2 t)}$           | Adj. R <sup>2</sup> | 0.9992             | 0.9966               | 0.9998               |
|                                 |                                                       | q <sub>e</sub>      | 199.20             | 181.16               | 108.34               |
|                                 |                                                       | k <sub>2</sub>      | 6×10 <sup>-4</sup> | 1.7×10 <sup>-4</sup> | 1.3×10 <sup>-3</sup> |
| <b>Intra-particle diffusion</b> | $q_t = x_i + k_i t^{1/2}$                             | Adj. R <sup>2</sup> | 0.8141             | 0.9400               | 0.7052               |
|                                 |                                                       | k <sub>i</sub>      | 8.5380             | 9.8599               | 4.5158               |
|                                 |                                                       | x <sub>i</sub>      | 90.752             | 21.583               | 52.219               |
| <b>Elovich</b>                  | $q_t = \frac{\ln a_e b_e}{b_e} + \frac{1}{b_e} \ln t$ | Adj. R <sup>2</sup> | 0.9612             | 0.9885               | 0.9127               |
|                                 |                                                       | a                   | 147.59             | 13.754               | 88.469               |
|                                 |                                                       | b                   | 0.0344             | 0.0280               | 0.0628               |

**Table S6** Langmuir, Freundlich, and Temkin parameters of iodine removal by **CP1**, **CP2** and **CP3** at room temperature.

| Models            | Equations                                      | CP1<br>Adj. R <sup>2</sup> | CP2<br>Adj. R <sup>2</sup> | CP3<br>Adj. R <sup>2</sup> |
|-------------------|------------------------------------------------|----------------------------|----------------------------|----------------------------|
| <b>Langmuir</b>   | $q_e = \frac{q_{\max} C_e k_L}{(1 + C_e k_L)}$ | 0.9989                     | 0.9872                     | 0.9790                     |
| <b>Freundlich</b> | $q_e = k_F C_e^{1/n}$                          | 0.9997                     | 0.9893                     | 0.9930                     |
| <b>Temkin</b>     | $q_e = B \ln(A_t C_e)$                         | 0.9953                     | 0.9713                     | 0.9784                     |

## X-ray crystallography

Diffraction data were collected at 100(1) K by the  $\omega$ -scan technique, using graphite-monochromated MoK $_{\alpha}$  radiation ( $\lambda=0.71073$  Å), on Rigaku XCalibur four-circle diffractometer with EOS CCD detector. The data were corrected for Lorentz-polarization as well as for absorption effects.<sup>2</sup> Precise unit-cell parameters were determined by a least-squares fit of the 8919 (**CP1**), 9998 (**CP2**) and 11958 (**CP3**) reflections of the highest intensity, chosen from the whole experiment. The structures were solved with SHELXT<sup>3</sup> and refined with the full-matrix least-squares procedure on F<sup>2</sup> by SHELXL.<sup>4</sup> All non-hydrogen atoms were refined anisotropically. Hydrogen atoms were placed in idealized positions and refined as ‘riding model’ with isotropic displacement parameters set at 1.2 (1.5 for CH<sub>3</sub>) times U<sub>eq</sub> of appropriate carrier atoms. In all structures, diffused electron density was found, caused probably by additional solvent molecules; the number of such molecules given in the formulae reflect the modelled molecules only. The Squeeze procedure<sup>5</sup> was applied in order to include this electron density in the model. In **CP1** and **CP2** one of the localized solvent DMSO molecules was refined in two alternative positions, site occupancy factors refined at 57.5(6)/42.5(6)% in **CP1** and at 50.7(12)/49.3(12)% in **CP2**.

### Analysis of Hirshfeld surfaces

The surfaces are transparent to permit visualization of the asymmetric unit of each coordination polymer. The intermolecular interactions data (cf. Table S4) makes clear that the interactions discussed widely in the crystal structure section are summarized effectively in the spots. The deep red large circular depressions on each and every face of the  $d_{\text{norm}}$  surfaces indicate that they have been encapsulated in the hydrogen bond interactions. The small extent of area and light color on the surface indicates weaker and longer contact other than hydrogen bonds and the blue spots indicate the areas without close contacts. The FPs of Hirshfeld surface for compounds and relative contributions of different interactions overlapping in the full FPs are shown in Fig. S13 and S14, respectively. The Hirshfeld surfaces mapped over  $d_{\text{norm}}$  shown (as expected) that the  $\text{H}\cdots\text{H}$ ,  $\text{O}\cdots\text{H}/\text{H}\cdots\text{O}$ ,  $\text{X}\cdots\text{H}/\text{H}\cdots\text{X}$  ( $\text{X} = \text{Cl}$ ,  $\text{Br}$  and  $\text{I}$ ) and  $\text{C}\cdots\text{H}/\text{H}\cdots\text{C}$  hydrogen contacts were the most outstanding interaction in the total Hirshfeld surface (Fig. S13). In all cases, the  $\text{O}\cdots\text{H}/\text{H}\cdots\text{O}$  interactions are highlighted by the two distinct spikes in the  $(d_i, d_e)$  region of (1.340, 1.020), (1.332, 1.022), (1.112, 0.772)  $\text{C}\cdots\text{H}/\text{H}\cdots\text{C}$  close contacts, which take almost 10% of the total surface (Fig. S13), can be attributed to  $\text{C}-\text{H}\cdots\pi$  interaction.

## References

- 1 P. Howlader, P. Das, E. Zangrando and P. S. Mukherjee, *J. Am. Chem. Soc.*, 2016, **138**, 1668-1676.
- 2 Rigaku Oxford Diffraction (2015) CrysAlis PRO (Version 1.171.38.41).
- 3 G. Sheldrick, *Acta Crystallographica Section A*, 2015, **71**, 3-8.
- 4 G. Sheldrick, *Acta Crystallographica Section C*, 2015, **71**, 3-8.
- 5 A. Spek, *Acta Crystallographica Section C*, 2015, **71**, 9-18.
